# Supplementary material for: Identification and Full Genome Analysis of the First Putative Virus of Sea Buckthorn (Hippophae rhamnoides L.)
Source: MDPI journal article supplement (doi:10.3390/microorganisms10101933), 2022-09-28
Supplement: s1 [file s1]

# Microorganisms

## Supplementary Data

# Identification and Full Genome Analysis of the First Putative Virus of Sea Buckthorn (*Hippophae rhamnoides* L.)

Ina Balke <sup>1,\*</sup>, Vilija Zeltina <sup>2</sup>, Nikita Zrelavs <sup>3</sup>, Ieva Kalnciema <sup>2</sup>, Gunta Resevica <sup>2</sup>, Rebeka Ludviga <sup>1</sup>, Juris Jansons <sup>4</sup>, Inga Moročko-Bičevska <sup>5</sup>, Dalija Segliņa <sup>6</sup> and Andris Zeltins <sup>2,\*</sup>

<sup>1</sup> Plant virus protein research group, Latvian Biomedical Research and Study Centre, Ratsupites street 1, k-1, LV-1067 Riga, Latvia

<sup>2</sup> Plant virology group, Latvian Biomedical Research and Study Centre, Ratsupites street 1, k-1, LV-1067 Riga, Latvia

<sup>3</sup> Bioinformatics core facility, Latvian Biomedical Research and Study Centre, Ratsupites street 1, k-1, LV-1067 Riga, Latvia

<sup>4</sup> Cell Biology and Microscopy Core facility, Latvian Biomedical Research and Study Centre, Ratsupites street 1, k-1, LV-1067 Riga, Latvia

<sup>5</sup> Unit of Plant Pathology and Entomology, Institute of Horticulture, Latvia University of Life Sciences and Technologies, Graudu street 1, LV-3701 Dobeles, Latvia

<sup>6</sup> Unit of Processing and Biochemistry, Institute of Horticulture, Latvia University of Life Sciences and Technologies, Graudu street 1, LV-3701 Dobeles, Latvia

\* Correspondence: inab@biomed.lu.lv (I.B.); anze@biomed.lu.lv (A.Z.)

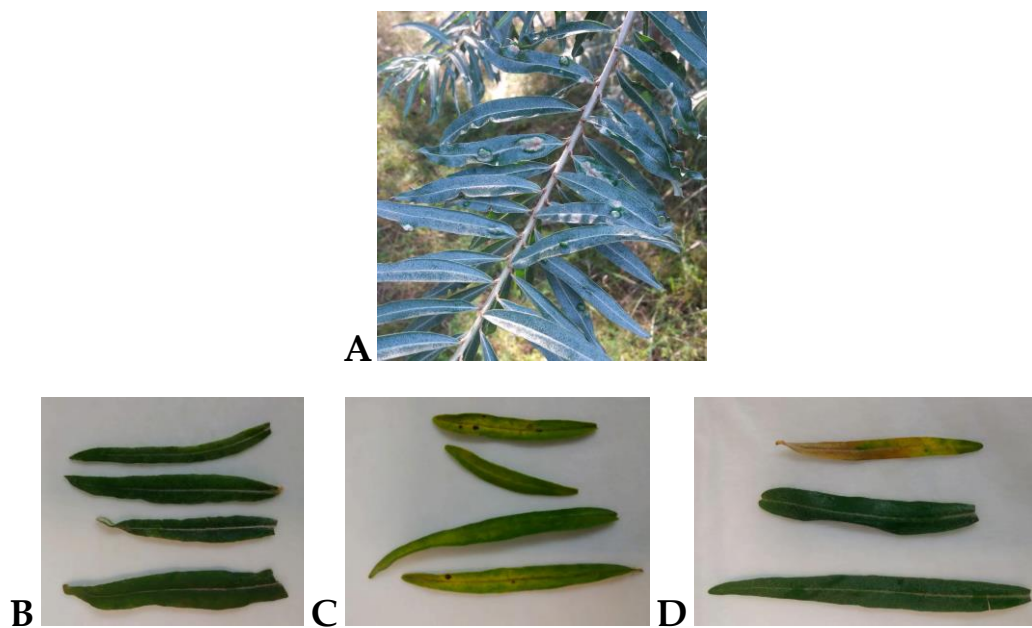

**Figure S1.** Sea buckthorn leaf samples collected in August 2017 and August 2021. A – representative leaf samples collected in August 2017; B-D – representative leaf samples collected in August 2021.

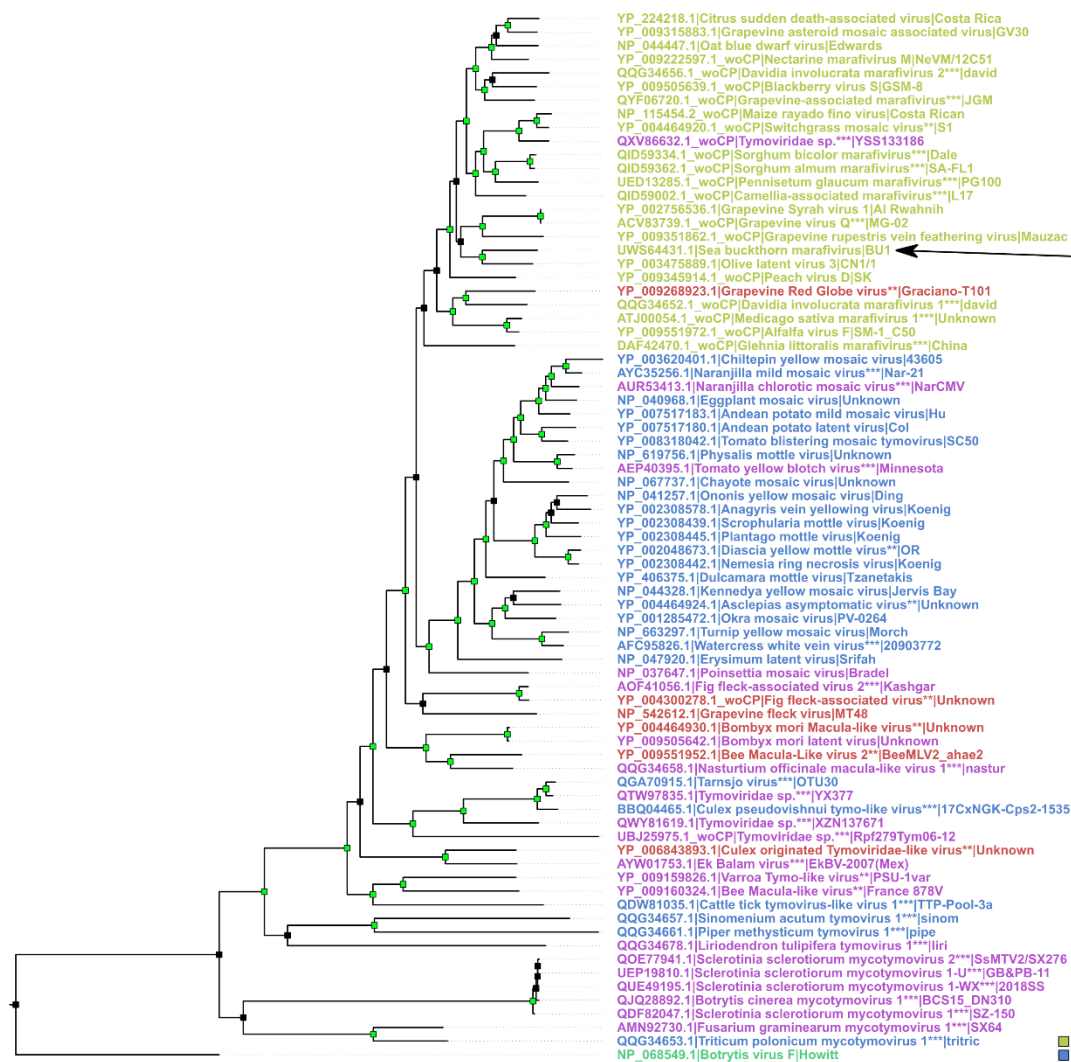

Maximum-likelihood

0.8

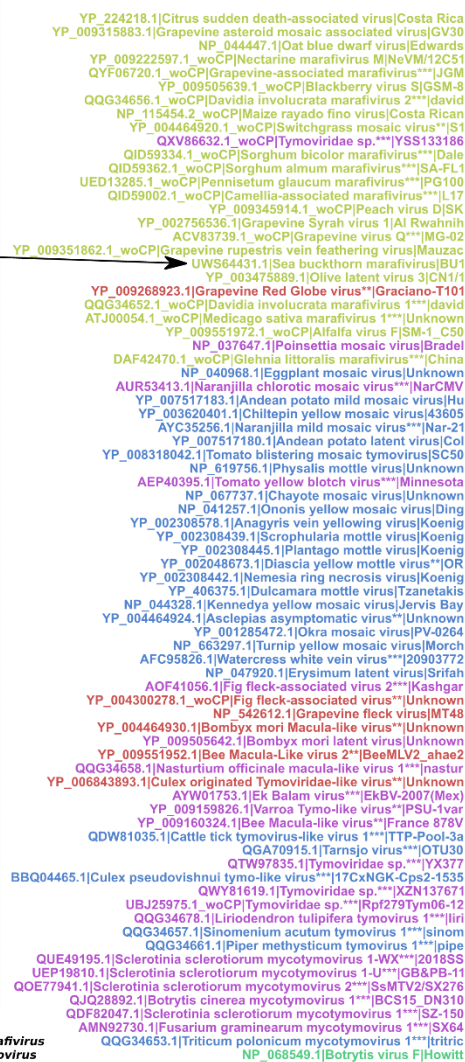

Neighbor-joining tree

0.04

**Figure S2.** Maximum-likelihood and neighbor-joining trees generated using *Tymoviridae* capsid protein sequence. Trees were drawn to scale with branch lengths in units of amino acid substitutions per site. In the case of capsid proteins that were encoded as part of the polyprotein, the last 300 aa of the polyprotein sequence containing presumed CP were used (indicated as “\_300last” next to the accession number of a respective sequence). Tree tip labels are in the form of sequence accession number | virus name | strain and are colored based on the genera to which the virus belongs according to the legend. Two asterisks (\*\*) after the virus name indicate that the virus originated from RefSeq and did not yet have a standing in the official virus taxonomy but was included in the analysis based on taxonomy associated with a RefSeq entry. Three asterisks (\*\*\*) after the virus name indicate that the sequence originated from the Nuccore database and did not yet have a standing in the official virus taxonomy but was included in the analysis based on taxonomy associated with a complete or near-complete genome GenBank entry that was longer than 6000 bases in length. Botrytis virus F, which is a member of the *Gammaflexiviridae* family, genus *Mycoflexivirus*, serves as an outgroup at which the trees are rooted. The black arrow connects the sea buckthorn marafivirus (SBuMV) leaves in both trees.

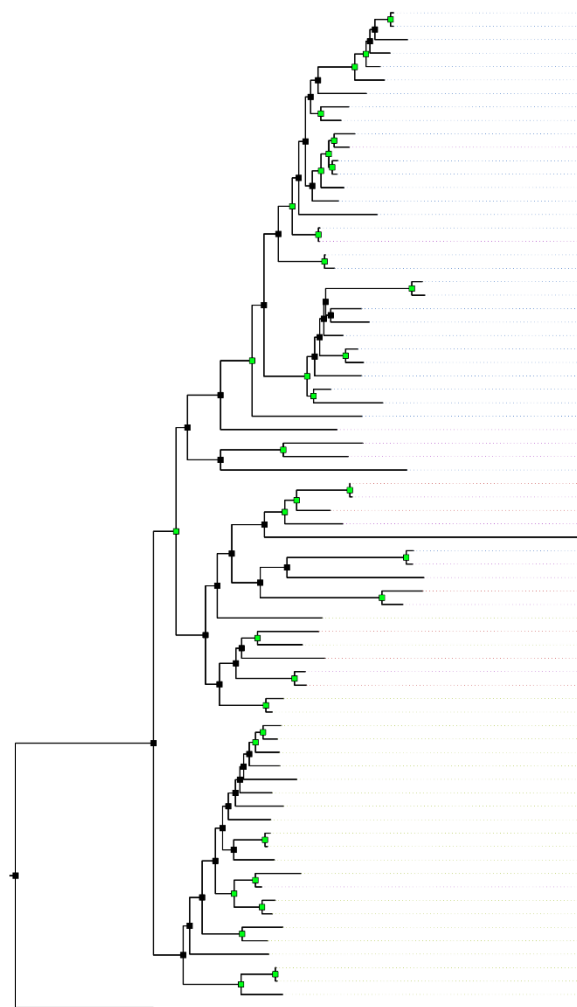

Maximum-likelihood

YP\_002048674.1|Diascia yellow mottle virus\*\*|OR  
 YP\_002308443.1|Nemesia ring necrosis virus|Koenig  
 NP\_041258.1|Ononis yellow mosaic virus|Ding  
 YP\_002308446.1|Plantago mottle virus|Koenig  
 YP\_002308440.1|Scrophularia mottle virus|Koenig  
 YP\_002308579.1|Anagryis vein yellowing virus|Koenig  
 NP\_067738.1|Chayote mosaic virus|Unknown  
 YP\_007517181.1|Andean potato latent virus|Col  
 YP\_008318043.1|Tomato blistering mosaic tymovirus|SC50  
 NP\_040969.1|Eggplant mosaic virus|Unknown  
 AUR53412.1|Naranjilla chlorotic mosaic virus\*\*|NarCMV  
 YP\_003620402.1|Chiltepin yellow mosaic virus|43605  
 AYC35257.1|Naranjilla mild mosaic virus\*\*|Nar-21  
 YP\_007517184.1|Andean potato mild mosaic virus|Hu  
 YP\_009664769.1|Petunia vein banding virus|Koenig  
 YP\_009664771.1|Wild cucumber mosaic virus|Unknown  
 NP\_619757.1|Physalis mottle virus|Unknown  
 AC196295.1|Tomato yellow blotch virus\*\*|Minnesota  
 YP\_406376.1|Dulcamara mottle virus|Tzanetakis  
 YP\_009508097.1|Belladonna mottle virus|European  
 NP\_663298.1|Turnip yellow mosaic virus|Morch  
 AFG95827.1|Watercress white vein virus\*\*|20903772  
 YP\_001285473.1|Okra mosaic virus|PV-0264  
 YP\_009505641.1|Desmodium yellow mottle virus|Keese  
 NP\_044329.1|Kennedy yellow mosaic virus|Jervis Bay  
 YP\_009505640.1|Clitoria yellow vein virus|Mackenzie  
 YP\_009508099.1|Cacao yellow mosaic virus|Ding  
 YP\_004464925.1|Asclepias asymptomatic virus\*\*|Unknown  
 AAC58458.1|Calopogonium yellow vein virus\*\*|Unknown  
 YP\_009664767.1|Passion fruit yellow mosaic virus|Unknown  
 NP\_047921.1|Erysimum latent virus|Srfah  
 NP\_037648.1|Poinsettia mosaic virus|Bradell  
 YP\_009159827.1|Varroa Tymo-like virus\*\*|IPSU-1var  
 YP\_009160325.1|Bee Macula-like virus\*\*|France 878V  
 QDW81036.1|Cattle tick tymovirus-like virus 1\*\*|ITTP-Pool-3a  
 YP\_004464931.1|Bombyx mori Macula-like virus\*\*|Unknown  
 YP\_009505643.1|Bombyx mori latent virus|Unknown  
 YP\_009551953.1|Bee Macula-Like virus 2\*\*|BeeMLV2\_ahae2  
 QQG34659.1|Nasturtium officinale macula-like virus 1\*\*|Inastur  
 QQG34679.1|Liriodendron tulipifera tymovirus 1\*\*|Iliri  
 BBQ04466.1|Culex pseudovishnui tymo-like virus\*\*|17CxNGK-Cps2-1535  
 QTW97836.1|Tymoviridae sp.\*\*|YX377  
 UBJ25975.1\_300last|Tymoviridae sp.\*\*|Rpf279Tym06-12  
 YP\_006843894.1|Culex originated Tymoviridae-like virus\*\*|Unknown  
 AYW01754.1|Ek Balam virus\*\*|EkBV-2007(Mex)  
 DAF42470.1\_300last|Glehnia littoralis marafivirus\*\*|China  
 YP\_009268924.1|Grapevine Red Globe virus\*\*|Graciano-T101  
 QQG34652.1\_300last|Davidia involucreta marafivirus 1\*\*|david  
 NP\_542613.1|Grapevine fleck virus|MT48  
 AOF41058.1\_300last|Fig fleck-associated virus 2\*\*|Kashgar  
 YP\_004300278.1\_300last|Fig fleck-associated virus\*\*|Unknown  
 ATJ00054.1\_300last|Medicago sativa marafivirus 1\*\*|Unknown  
 YP\_009551972.1\_300last|Alfalfa virus FISM-1\_C50  
 YP\_224219.1|Citrus sudden death-associated virus|Costa Rica  
 YP\_009222597.1\_300last|Nectarine marafivirus M|NeVM/12C51  
 YP\_009315885.1|Grapevine asteroid mosaic associated virus|GV30  
 NP\_044448.1|Oat blue dwarf virus|Edwards  
 QYF06720.1\_300last|Grapevine-associated marafivirus\*\*|JGM  
 YP\_009505639.1\_300last|Blackberry virus S|GSM-8  
 QQG34656.1\_300last|Davidia involucreta marafivirus 2\*\*|david  
 QID59002.1\_300last|Camellia-associated marafivirus\*\*|L17  
 QID59334.1\_300last|Sorghum bicolor marafivirus\*\*|Dale  
 QID59362.1\_300last|Sorghum alnum marafivirus\*\*|SA-FL1  
 UED13285.1\_300last|Pennisetum glaucum marafivirus\*\*|PG100  
 AAK85135.1|Bermuda grass etched-line virus|Maccheroni  
 QXV86632.1\_300last|Tymoviridae sp.\*\*|YSS133186  
 NP\_115454.2\_300last|Maize rayado fino virus|Costa Rican  
 YP\_004464920.1\_300last|Switchgrass mosaic virus\*\*|S1  
 UWS64432.1|Sea buckthorn marafivirus|BU1  
 YP\_003475891.1|Olive latent virus 3|CN1/1  
 YP\_009345914.1\_300last|Peach virus D|SK  
 YP\_002775441.1|Grapevine Syrah virus 1|AI Rwahni  
 ACV83739.1\_300last|Grapevine virus Q\*\*|MG-02  
 YP\_009351862.1\_300last|Grapevine rupestris vein feathering virus|Mauzac  
 NP\_068550.1|Botrytis virus F|Howitt

■ Marafivirus  
 ■ Tymovirus  
 ■ Maculavirus  
 ■ Unassigned  
 ■ Mycoflexivirus\*

YP\_003620402.1|Chiltepin yellow mosaic virus|43605  
 AYC35257.1|Naranjilla mild mosaic virus\*\*|Nar-21  
 AUR53412.1|Naranjilla chlorotic mosaic virus\*\*|NarCMV  
 NP\_040969.1|Eggplant mosaic virus|Unknown  
 YP\_007517184.1|Andean potato mild mosaic virus|Hu  
 YP\_009664769.1|Petunia vein banding virus|Koenig  
 YP\_008318043.1|Tomato blistering mosaic tymovirus|SC50  
 NP\_619757.1|Physalis mottle virus|Unknown  
 AC196295.1|Tomato yellow blotch virus\*\*|Minnesota  
 NP\_067738.1|Chayote mosaic virus|Unknown  
 YP\_009664771.1|Wild cucumber mosaic virus|Unknown  
 YP\_002048674.1|Diascia yellow mottle virus\*\*|OR  
 YP\_002308443.1|Nemesia ring necrosis virus|Koenig  
 YP\_002308440.1|Scrophularia mottle virus|Koenig  
 YP\_002308446.1|Plantago mottle virus|Koenig  
 NP\_041258.1|Ononis yellow mosaic virus|Ding  
 YP\_002308579.1|Anagryis vein yellowing virus|Koenig  
 YP\_406376.1|Dulcamara mottle virus|Tzanetakis  
 YP\_009508097.1|Belladonna mottle virus|European  
 NP\_044329.1|Kennedy yellow mosaic virus|Jervis Bay  
 YP\_009505641.1|Desmodium yellow mottle virus|Keese  
 YP\_009505640.1|Clitoria yellow vein virus|Mackenzie  
 YP\_009508099.1|Cacao yellow mosaic virus|Ding  
 YP\_004464925.1|Asclepias asymptomatic virus\*\*|Unknown  
 NP\_663298.1|Turnip yellow mosaic virus|Morch  
 AFG95827.1|Watercress white vein virus\*\*|20903772  
 YP\_009664767.1|Passion fruit yellow mosaic virus|Unknown  
 NP\_047921.1|Erysimum latent virus|Srfah  
 NP\_037648.1|Poinsettia mosaic virus|Bradell  
 AOF41058.1\_300last|Fig fleck-associated virus 2\*\*|Kashgar  
 YP\_004300278.1\_300last|Fig fleck-associated virus\*\*|Unknown  
 QQG34652.1\_300last|Davidia involucreta marafivirus 1\*\*|david  
 NP\_542613.1|Grapevine fleck virus|MT48  
 YP\_009268924.1|Grapevine Red Globe virus\*\*|Graciano-T101  
 ATJ00054.1\_300last|Medicago sativa marafivirus 1\*\*|Unknown  
 YP\_009551972.1\_300last|Alfalfa virus FISM-1\_C50  
 DAF42470.1\_300last|Glehnia littoralis marafivirus\*\*|China  
 YP\_004464931.1|Bombyx mori Macula-like virus\*\*|Unknown  
 YP\_009505643.1|Bombyx mori latent virus|Unknown  
 YP\_009551953.1|Bee Macula-Like virus 2\*\*|BeeMLV2\_ahae2  
 QQG34659.1|Nasturtium officinale macula-like virus 1\*\*|Inastur  
 BBQ04466.1|Culex pseudovishnui tymo-like virus\*\*|17CxNGK-Cps2-1535  
 QTW97836.1|Tymoviridae sp.\*\*|YX377  
 UBJ25975.1\_300last|Tymoviridae sp.\*\*|Rpf279Tym06-12  
 YP\_009159827.1|Varroa Tymo-like virus\*\*|IPSU-1var  
 YP\_009160325.1|Bee Macula-like virus\*\*|France 878V  
 QDW81036.1|Cattle tick tymovirus-like virus 1\*\*|ITTP-Pool-3a  
 YP\_006843894.1|Culex originated Tymoviridae-like virus\*\*|Unknown  
 AYW01754.1|Ek Balam virus\*\*|EkBV-2007(Mex)  
 YP\_224219.1|Citrus sudden death-associated virus|Costa Rica  
 YP\_009222597.1\_300last|Nectarine marafivirus M|NeVM/12C51  
 YP\_009315885.1|Grapevine asteroid mosaic associated virus|GV30  
 NP\_044448.1|Oat blue dwarf virus|Edwards  
 YP\_009505639.1\_300last|Blackberry virus S|GSM-8  
 QID59002.1\_300last|Camellia-associated marafivirus\*\*|L17  
 QQG34656.1\_300last|Davidia involucreta marafivirus 2\*\*|david  
 QYF06720.1\_300last|Grapevine-associated marafivirus\*\*|JGM  
 QID59334.1\_300last|Sorghum bicolor marafivirus\*\*|Dale  
 QID59362.1\_300last|Sorghum alnum marafivirus\*\*|SA-FL1  
 UED13285.1\_300last|Pennisetum glaucum marafivirus\*\*|PG100  
 UWS64432.1|Sea buckthorn marafivirus|BU1  
 AAK85135.1|Bermuda grass etched-line virus|Maccheroni  
 QXV86632.1\_300last|Tymoviridae sp.\*\*|YSS133186  
 NP\_115454.2\_300last|Maize rayado fino virus|Costa Rican  
 YP\_004464920.1\_300last|Switchgrass mosaic virus\*\*|S1  
 YP\_009345914.1\_300last|Peach virus D|SK  
 YP\_002775441.1|Grapevine Syrah virus 1|AI Rwahni  
 ACV83739.1\_300last|Grapevine virus Q\*\*|MG-02  
 YP\_009351862.1\_300last|Grapevine rupestris vein feathering virus|Mauzac  
 NP\_068550.1|Botrytis virus F|Howitt

Neighbor-joining tree

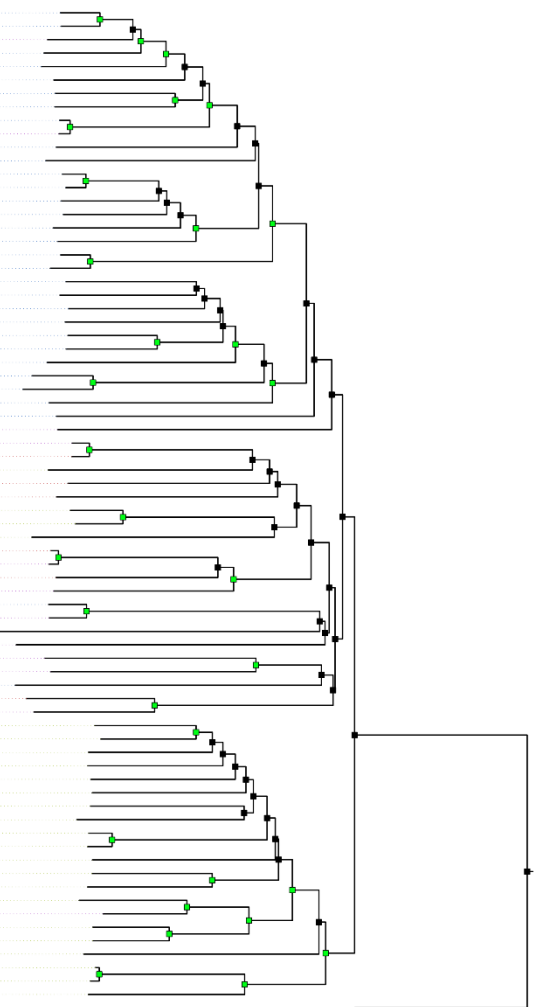

**Figure S3.** *Tymoviridae* polyprotein aa sequence with maximum-likelihood and neighbor-joining trees. Trees were drawn to scale with branch lengths in units of amino acid substitutions per site. In the case of polyproteins that encoded capsid proteins as well, the last 300 aa of the sequence were truncated (indicated as “\_woCP” next to the accession number of a respective sequence). Tree tip labels are in the form of sequence accession number|virus name|strain and are colored based on the genera to which the virus belongs according to the legend. Two asterisks (\*\*) after the virus name indicate that the virus originated from RefSeq and did not yet have a standing in the official virus taxonomy but was included in the analysis on the basis of taxonomy associated with a RefSeq entry. Three asterisks (\*\*\*) after the virus name indicate that the sequence originated from the Nuccore database and does not yet have a standing in the official virus taxonomy but was included in the analysis on the basis of taxonomy associated with a complete or near-complete genome GenBank entry that was longer than 6000 bases in length. Botrytis virus F, which is a member of the *Gammaflexiviridae* family, genus *Mycoflexivirus*, serves as an outgroup at which the trees are rooted. The black arrow connects the Sea buckthorn marafivirus (SBuMV) leaves in both trees.

# File S1. Alignment of marafivirus RP and CP with coded protein domain motifs using PROMALS3D.

|                       |     |                                                                                                                  |     |
|-----------------------|-----|------------------------------------------------------------------------------------------------------------------|-----|
| Conservation:         | 9   |                                                                                                                  |     |
| YP_009505639.1_BlVS   | 1   | MER-----SNSNLFASSTAC <b>CFSLAIP</b> ISPLDFSPNAEESLLP-----                                                        | 38  |
| MZ422607.1_GaMV       |     | -----                                                                                                            |     |
| ADD13602.1_OBDV       | 1   | MT-----TYAFHPLLPTPTSFAT-----                                                                                     | 18  |
| AYC35261.1_CSDaV      | 1   | MD-----RISARIPVAPATAGPTVYVPYPHTHPLLPRGVFTSGPIQPRHLFLPHHAQ                                                        | 52  |
| QLM05437.1_GAMaV      | 1   | MD-----ASTPLPSFFHGPSPAVEVAPLPPSPECPLTPGFSLSPPSPSPLSPPPS-                                                         | 50  |
| YP_009222597.1_NeVM   | 1   | MT-----PSNFPHLLARSSPKSSRTPAPTAPR-----                                                                            | 28  |
| MZ305310.1_PGMV       | 1   | ME-----                                                                                                          | 2   |
| QID59334.1_SbMV       | 1   | MA-----STSDQGPTGTPIWRRMP-----                                                                                    | 19  |
| QID59002.1_CaMaV      | 1   | MEC-----SLFTSIIFSWTTSQNNITYSSTPATPVARAEGPYFDPEFAKPHLPGATG-                                                       | 52  |
| QQG34656.1_DiMV2      | 1   | MS-----SPSTSSCDFVVSTSLIQDLRAQFLGSGNIKYAPLSASRPTFHDHLHPHF-                                                        | 51  |
| YP_004464920.1_SwMV   | 1   | MS-----                                                                                                          | 2   |
| NP_115454.2_MRfV      | 1   | MS-----                                                                                                          | 2   |
| QCC30252.1_PeDV       | 1   | M-----                                                                                                           | 1   |
| SBuMV-BU1             | 1   | MA-----ALNPSFASFISTFPSPAPEEYHFTCPSPFLLEDVETSIPIL-                                                                | 43  |
| YP_003475889.1_OLV-3  | 1   | MAA-----SWTSFSSLLSNPLSLAQRIILTPPHNPSIPSLPKSGFRSVTSLSDPSDAL-                                                      | 52  |
| YP_009551972.1_AVF    | 1   | MS-----TNFQIIPLSFDDSSPSPSPNTAPAPSPKIKYITPHLSVRFHLVPKRF-                                                          | 50  |
| ATJ00054.1_MsMV1      | 1   | MS-----TSYNIDLV-----DVSSPSLPETSQRISYLSPHLCVRFHLPVKAF-                                                            | 42  |
| QQG34652.1_DiMV1      | 1   | MVLFYFGLGNELASRRFFSPSPNFHLNHLILQAAAASHLAFSTLKPSDIKPTTTTSSNIIP-LPRPTPI                                            | 69  |
| YP_002756536.1_GSyV-1 | 1   | MAAPAT-----AYASPSAAFFALFQEQLRCFR-----PLTLAHSRLYDAPVRPRQLP----                                                    | 48  |
| QUS93818.1_GRVfV      | 1   | MAFPSNLSTM---LPAHLYQRPSHSLW--FNPSSQPFEVLPHMVPANFPHLFRNIPTFLERSMPVRS-                                             | 64  |
| Consensus_aa:         |     | <b>Ms</b> .....                                                                                                  |     |
| Consensus_ss:         |     | eeeeeee                                                                                                          |     |
| Conservation:         |     |                                                                                                                  |     |
| YP_009505639.1_BlVS   |     | -----                                                                                                            |     |
| MZ422607.1_GaMV       |     | -----                                                                                                            |     |
| ADD13602.1_OBDV       |     | -----                                                                                                            |     |
| AYC35261.1_CSDaV      | 53  | DAPIRCYRPLTYANHLRYDRSASSLKTSVPKLP-----                                                                           | 85  |
| QLM05437.1_GAMaV      | 51  | -----PSPISLTPEPSSLP-----QLPLSPAHLRCRVLNHV                                                                        | 80  |
| YP_009222597.1_NeVM   |     | -----                                                                                                            |     |
| MZ305310.1_PGMV       |     | -----                                                                                                            |     |
| QID59334.1_SbMV       |     | -----                                                                                                            |     |
| QID59002.1_CaMaV      | 53  | -----PLTYRSYIRLVPAY-----GTPPKGLRPLLLKKSGL                                                                        | 82  |
| QQG34656.1_DiMV2      | 52  | -----YPASSALDAPLHHF-----RPLTLQRFHEQNWRTH                                                                         | 81  |
| YP_004464920.1_SwMV   |     | -----                                                                                                            |     |
| NP_115454.2_MRfV      |     | -----                                                                                                            |     |
| QCC30252.1_PeDV       |     | -----                                                                                                            |     |
| SBuMV-BU1             |     | -----                                                                                                            |     |
| YP_003475889.1_OLV-3  | 53  | -----TRAQMFSPTKAILSPAASPTPASQPDPPAEPCSDPPTETTVPSSKRALL                                                           | 101 |
| YP_009551972.1_AVF    | 51  | -----PHSEPIF-----                                                                                                | 57  |
| ATJ00054.1_MsMV1      | 43  | -----PRKPQPTF-----                                                                                               | 50  |
| QQG34652.1_DiMV1      | 70  | RKPKPVFIPPPSTNVSRRRRVSHAAYAHQTPHSTSPYLNAPLTFPSLNTATPLPLSRHSPNTYHPHA                                              | 139 |
| YP_002756536.1_GSyV-1 | 49  | -----RLRSITV-----PITSLDEGFTPIILIA                                                                                | 70  |
| QUS93818.1_GRVfV      | 65  | -----LGDFKPSRLRPVTLFGGAPPPLGPIIHPAYVAPEPLSSIPITFAP--AA                                                           | 111 |
| Consensus_aa:         |     | .....                                                                                                            |     |
| Consensus_ss:         |     |                                                                                                                  |     |
|                       |     | <b>CS</b>  <b>MTase-GTase</b> |     |
|                       |     | 6 96 5 9 79 97897 68759 5 659                                                                                    |     |
| YP_009505639.1_BlVS   | 39  | -----LQGA-----GFKDVIEALAP <b>TSHRDTISSALLETTVDPF</b> RS                                                          | 74  |
| MZ422607.1_GaMV       | 1   | -----G-----GLKEVIEFLTPTIHRDTITSPLETTIATPFRS                                                                      | 33  |
| ADD13602.1_OBDV       | 19  | -----VTGG-----GLKDVIELSSTIHRDTIAAPLMEETLASPYRD                                                                   | 54  |
| AYC35261.1_CSDaV      | 86  | -----LTGG-----TLADAILSLAPTTHRDTIATPLMEALAEPYRQ                                                                   | 121 |
| QLM05437.1_GAMaV      | 81  | R-----LTGG-----GLMDVIQSLAPTTHRDTIASPLVEAIAEPYRR                                                                  | 117 |
| YP_009222597.1_NeVM   | 29  | -----LVGG-----GLREVLAALAPTTHRDTVAAPLLEAVATPFRD                                                                   | 64  |
| MZ305310.1_PGMV       | 3   | -----KAIISFLTPTNHRETITAPLLERIAAPFRG                                                                              | 31  |
| QID59334.1_SbMV       | 20  | -----FRGA-----GFADAVAALTPTIHRDTITAPLLES LAPSFRT                                                                  | 55  |
| QID59002.1_CaMaV      | 83  | GRSLP-----LRDLARQLHAASHPRPY <b>LRGG</b> -----GMRDAVDVLTPTTHRDTITAPLLES LAPTFRG                                   | 140 |
| QQG34656.1_DiMV2      | 82  | RIHLT-----GSSPNRVSFKSLPASPS <b>LRGG</b> -----CMKDAIDSLTPTTHRDTITAPLVENLATPFRS                                    | 139 |
| YP_004464920.1_SwMV   | 3   | -----VF <b>LRGG</b> -----HLLSGVESLTPTTHRDTITAPIVESLATPLRR                                                        | 40  |
| NP_115454.2_MRfV      | 3   | -----SF <b>LRGG</b> -----HLLSGVESLTPTTHRDTITAPIVESLATPLRR                                                        | 40  |
| QCC30252.1_PeDV       | 2   | -----FKTIIDSLSSTAHRDTVSSPLVEAVSQPLRE                                                                             | 32  |
| SBuMV-BU1             | 44  | -----PEQTPAQSQSTQELPL <b>LSGG</b> -----GMKDVLDFLTPTIHRDTVSSPIMEKIAAPLRS                                          | 96  |
| YP_003475889.1_OLV-3  | 102 | DSHSP-----SPVIPVDETAPISPPIR <b>LTGS</b> -----GLKDLVDFLNPTVHRDTIAAPLLETISQPLRD                                    | 159 |
| YP_009551972.1_AVF    | 58  | ----- <b>LSGG</b> -----TLFQNAIDALSSTVHKDTITSPLESITKPF                                                            | 94  |
| ATJ00054.1_MsMV1      | 51  | ----- <b>LSGG</b> -----TLFQNAIDALSSTVHKDTITSPLESITKPF                                                            | 87  |
| QQG34652.1_DiMV1      | 140 | KVHVPNLLFKPISTRKLIKQILRKSPPRIV <b>LTGG</b> APSTPFRSIFEALSSSTIHRDTVAAPLVEAVATPLRN                                 | 209 |
| YP_002756536.1_GSyV-1 | 71  | RPSLP----- <b>LLGG</b> -----GLKELVEMLAPTTHRDTVASPILEAVAGPLRT                                                     | 111 |
| QUS93818.1_GRVfV      | 112 | EPKTP-----SPTAISRRFYRPS----- <b>LSGG</b> -----GLKELVEILNPTVHRDTVCSPLEAAAGPLRD                                    | 165 |
| Consensus_aa:         |     | ..... <b>LpGG</b> ..... <i>h.phlp.LssThHRDTlhtPLLEsIt.Phrp</i>                                                   |     |
| Consensus_ss:         |     | hhhhhhhhh hhhhhhhhhhhhhhhhhhhhhhh                                                                                |     |







|                       |                                                                 |                                                                               |
|-----------------------|-----------------------------------------------------------------|-------------------------------------------------------------------------------|
| Conservation:         | 7798677 56 5 7 9 9 96 79 7 67 9 979989 78 558 97969999958995877 |                                                                               |
| YP_009505639.1_BlVS   | 285                                                             | SLLIQRGEPLHSRHTAEFRTPPAILLPAPSSSLNQDVRHRLVPKVKYDAVFLLVVRTVRLTRVTDPAAGFI 354   |
| MZ422607.1_GaMV       | 244                                                             | HLLIQRGLPPVHARHDELDFRVPAAILLPEASSLHQPIRDLRLAPKAVYEAIFIYVRAVRTLRRTDPAAGFV 313  |
| ADD13602.1_OBDV       | 265                                                             | SLLIQRGIPPMHAHDSISFRGPRAVAIPEPSSSLHQDLRHLVPEDVYNALFLYVRAVRTLRVTDPAAGFV 334    |
| AYC35261.1_CSDaV      | 332                                                             | SLLIQRGKPIIHLEEDSLFRAPKAVLLPEPSSSLQAVRDRLVPADVYQALFIFYVRAVRTLRVTDPAAGFV 401   |
| QLM05437.1_GAMaV      | 328                                                             | SLLIQRGTTPPVHAERDTISFRAPKAVVLPNPSSLTQPLRDLRVPKDVYTAIFVYVRAVRTLRVTDPAAGFV 397  |
| YP_009222597.1_NeVM   | 275                                                             | SLLIQRGVPVPHQEVDTVSFKAPRAVALPEPSSSLHQDLRHLVPKDVYDALFIYVRAVRTLRVTDPAAGFV 344   |
| MZ305310.1_PGMV       | 242                                                             | SLLIQRGKPPIHVDDDTVEFTTPEAYALPQPASLHQDLRHLVPAKVYNELFVYVRAVRTLRRTDPAAGFV 311    |
| QID59334.1_SbMV       | 265                                                             | SLLIQRGVPPHHAERDSVSFTGPDAILLPEPASLTQDPRHRLVPSKVYHELFIYVRAVRTLRVTDPAAGFV 334   |
| QID59002.1_CaMaV      | 351                                                             | SMLIQRGEAPLHQYRSRASFRGPEAVCLPSPASLHQDLRHLVPKKVYDAIFMYVRAVRTLRVTDPAAGFV 420    |
| QQG34656.1_DiMV2      | 350                                                             | HLLIQRGEPPVHSREDLLDFKVPQAILLPAPSSSLNQEIRHRLVPKKVYDSLFVYVRAVRTLRVTDPAAGFV 419  |
| YP_004464920.1_SwMV   | 251                                                             | SLLIQRGRPPVFSAEDEVSRVDPDAIALPAPASLHQDLRHLVPRRVYDALFNYVRAVRTLRVTDPAAGFV 320    |
| NP_115454.2_MRFV      | 251                                                             | SLLIQRGRPPVFAEDIASFRVDPDAVALPAPASLHQDLRHLVPRKVYDALFNYVRAVRTLRVTDPAAGFV 320    |
| QCC30252.1_PeDV       | 243                                                             | SLLIQRGRPHMHEDEDTVYEFKVPKAVALLPEPASLRQDLRHLVPADVHDALFVYTRAVRTLRTDPAAGFV 312   |
| SBuMV-BU1             | 307                                                             | SLLIQRGLPPVHSHDTHSFKVPDAIILLPEPAHLNQPIRHLRVPVAVYQAVLLYVRAVRTLRRTDPAAGFV 376   |
| YP_003475889.1_OLV-3  | 370                                                             | SLLIQRGLPLPHQEHSQTAEKTPPEAILLPAPSHLQDLRHLRVPTRVYESIFVYVRAVRTLRVTDPSGYV 439    |
| YP_009551972.1_AVF    | 305                                                             | SMLISKSNFPFDAETDTISFKVPSAILLPEPNSLSQDPRHRLVPTKIYHAIFAYVRAVRTLRVTDPAAGFI 374   |
| ATJ00054.1_MsMV1      | 298                                                             | SMLITKSQLPFDASQDRIDEKVPSSAILLPEPNSLNQNPRLHRLVPTKIYHAIFAYVRAVRTLRVTDPAAGFI 367 |
| QQG34652.1_DiMV1      | 420                                                             | SLLIQRGLAPITSSHDTITERTPSAILLPEANSIRQDIRHRLVPKDIYHNLFSTVRSVRTLRVTDPAAGYI 489   |
| YP_002756536.1_GsYV-1 | 322                                                             | SLLIQRGKPSVHLEDEVSEFVGPDVALPEAAALRQDLRHLRVPRTVYDALFVYVRAVRTLRRTDPAAGFV 391    |
| QUS93818.1_GRVFV      | 376                                                             | SLLITRGRPPV-LTDDSLFESSPDAVEIPAASSIQQSLRHLRVPKSAVYHSLFIYVRAVRTLRQTDPAAGYV 444  |
| Consensus_aa:         |                                                                 | SLLIQRG.sPhc.ppDphsFpsPpAlhLp.ssSLpQshRHRLVppVYptlFhYVRAVRTLRhTDPtGFV         |
| Consensus_ss:         | eeeeee                                                          | eeeeee hhhhhhhhhhhhhhh hhhhh                                                  |

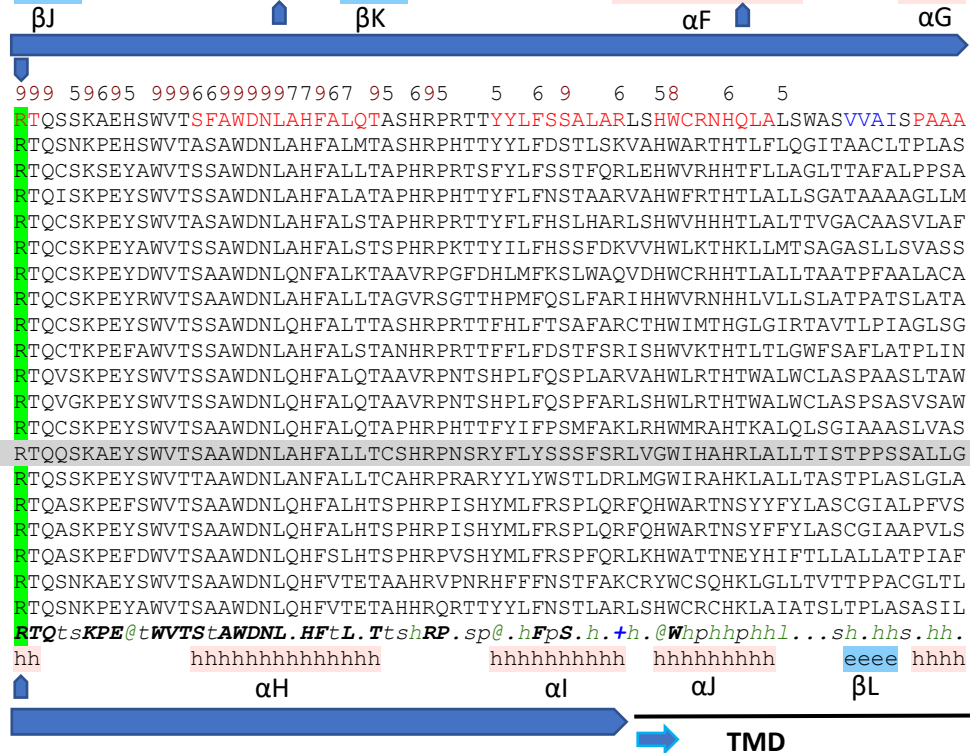

|                       |       |                                                                             |
|-----------------------|-------|-----------------------------------------------------------------------------|
| Conservation:         | 5 7 6 |                                                                             |
| YP_009505639.1_BlVS   | 425   | LSSLVSKFLRSELNLSLAIFRRWI--KAPP-----HF-L-----FAPKAPFLSMSFRALRTGPLLFANTG 481  |
| MZ422607.1_GaMV       | 384   | LSALGLAHFSRCRISALSIFGHWL--VCPD-----FYL-----LKPAPFLRLAVAPASAPFRAFKGTF 440    |
| ADD13602.1_OBDV       | 405   | WLANLVARTSASHIQGLALARRWL--ITPP-----HLF-----RPPSPSFALLLQRNSTGPILLRGSR 461    |
| AYC35261.1_CSDaV      | 472   | TASWGFRAMISSHLVSLICKRWL--RAPP-----HLL-----WPEKAPWFQTLTRPKVTGPLIDLPIIL 528   |
| QLM05437.1_GAMaV      | 468   | VGCRVAAGLSNQQLRSLACLRRWI--VAPP-----HLPF-----FRPKAPLLELTLRPKVTGPLVNLPLV 525  |
| YP_009222597.1_NeVM   | 415   | SLFLAIGRVLNSHVHSFAVFRRWL--KPPP-----HLL-----WPPKAPLLELSLARSTGPTVLSGTP 471    |
| MZ305310.1_PGMV       | 382   | TIVKAGETLYHSHLDELTVARHRLVGSQPF-----RLSI-----WKERLPLFRIMHRECTGWTFFQGS 441    |
| QID59334.1_SbMV       | 405   | TGVSALGHLAHRHIDELTVAGRTLIGRAPR-----HFSI-----WKPATTFWRRLTHAPCTGWTLWPGTI 464  |
| QID59002.1_CaMaV      | 491   | ASCWLFHRLITGHVDQCAILGRWV--KVPF-----GMSKLPRI--ALPPAPWFSLQTHAGGAGIKLLRGTR 552 |
| QQG34656.1_DiMV2      | 490   | RLACSLSNFTCSKVTLSLLKFWI--IKPK-----YFF-----RLPPARLFSLTG-----LFKDTI 538       |
| YP_004464920.1_SwMV   | 391   | LAASRFGRLLTVLHTRDLRLFGCDL--IGRR-----FWPILPFQSPPEARFLWETHSACKPYTLFAGSA 450   |
| NP_115454.2_MRFV      | 391   | ATASALGRLLPLHTDRLRLFGFDI--IGRR-----FWPRLPFHGPEPRFLWETHPACRPPVLFADSA 450     |
| QCC30252.1_PeDV       | 383   | TAAYATARARCPIESLAVCGWWI--KSPP---TIKHALREAVGFPPQKAPQFSIALTPRPAAPFGWK--- 444  |
| SBuMV-BU1             | 447   | LTSFSLARFYWRQISTLVLFRRFPI--ISPPTSFLSRLSF-----RSALPPLFLKLTQVPRPVW----- 502   |
| YP_003475889.1_OLV-3  | 510   | SSALLACRPFWMRLDSLQLLNRWV--IKPS--FPRNLPFLLPKAFQPKASLFAEFLPRHAPS----- 568     |
| YP_009551972.1_AVF    | 445   | ALSLTSLHLSRCSVHHFSLFRHWF--VPPP-NPHFLFNFHSLFLLPKAPFSLQLHNPFPPTLSK--- 508     |
| ATJ00054.1_MsMV1      | 438   | LSSVLAHHYSRCSILHLALFKKWI--VAPP--SSNFLPFFLSSRFIPKAPFFSLALHNPVPRPTLRF--- 500  |
| QQG34652.1_DiMV1      | 560   | KLSSFLTTPAPRLYIKQLTVFSSHLL--VGRPSLAHRYLPPIIRH-FLTPTPRFSLHLGTRPAI----- 618   |
| YP_002756536.1_GsYV-1 | 462   | FTGAKLASAMSSRLTALAVFHHWV--VPPP-TLF-----FTPKAPLLAIQLTRLPQP--LFSSVP 516       |
| QUS93818.1_GRVFV      | 515   | LALGGVDLLWKHSIKHLVIAHRYLIGSAPL----HARLLPRFLVQQHYPRFSLALEPRVAAPVIHL--P 577   |
| Consensus_aa:         |       | h.t..h..h...plppshh..hl...sP.....h.h....h.s.hpl.h.s.....hl.....             |
| Consensus_ss:         | h     | eeeeeeee hhhhhhhhhhh                                                        |

|                       |     |                           |                   |                       |                     |            |           |       |       |        |      |     |
|-----------------------|-----|---------------------------|-------------------|-----------------------|---------------------|------------|-----------|-------|-------|--------|------|-----|
| Conservation:         |     | 6                         | 65                |                       | 8                   | 8          | 6         | 896   | 99    | 759    | 9    |     |
| YP_009505639.1_BlVS   | 482 | FQTRLFPTAAQNFCSAN         | PLLASFF           | -PVKPLHRG             | -AFLASLLAASVPVALLLV | -RQFV      | GPDS      | PQSMH | DAYA  |        |      | 548 |
| MZ422607.1_GaMV       | 441 | LAFDVFPRLTQDLLHRVPLLRFF   | -PRRPLPNA         | -CWWACLA              | ASIPAF              | LWAC       | -RWFV     | GPDS  | PQMH  | DAYH   |      | 507 |
| ADD13602.1_OBDV       | 462 | LEFEAFPSLAPQLARRFFFLARLL  | -PQKPINPW         | -IVASLAVAVAI          | PAASLAV             | -RWF       | FGPDT     | PQAMH | DRYH  |        |      | 528 |
| AYC35261.1_CSDaV      | 529 | RPFRFLPSTCAKLGAKHPALATLL  | -PAAPRPTW         | -PLKVG                | LALA                | AVPCL      | FLW       | -RNF  | IGPDS | PQMDH  | SYH  | 595 |
| QLM05437.1_GAMaV      | 526 | RPFRFLPPTTCARLGARHPAVALFL | -PPKALTSS         | -WLPYALG              | AAAIPL              | LALLGI     | -RWFL     | GPDS  | PQAMH | DQYH   |      | 592 |
| YP_009222597.1_NeVM   | 472 | FAFKLLPKTFCRLGASYPSLAKFL  | -PKCPIPRK         | -YLWLS                | IAAASL              | PLIALGV    | -RFFL     | GPDS  | PQSLH | DRYH   |      | 538 |
| MZ305310.1_PGMV       | 442 | FETRPFDNLCSRLG-KKPAFARFL  | -PTRPIGGK         | -WLWAMA               | AAVA                | AVPAALLAI  | -RWVL     | GPDS  | PQALH | DRYQ   |      | 507 |
| QID59334.1_SbMV       | 465 | FETKILHRVAADLG-RSRWLARYL  | -PNRPLHRY         | -WTYAAL               | GLSAVPA             | IAIALAI    | -RWFL     | GPDS  | PQALH | DRYQ   |      | 530 |
| QID59002.1_CaMaV      | 553 | FEFQLFNQLFRSWA-RNPWLAQFL  | -PRRRMGKL         | -GWSFLL               | TSIMAP              | ILSLAA     | -RKFL     | GPDS  | PQSLH | DSYH   |      | 618 |
| QQG34656.1_DiMV2      | 539 | LQCQPFQNFQQLAIKFPAAHFL    | -PQKPLPFI         | -ALFMC                | VASTL               | APTVMGL    | -RQFF     | GPDS  | PQAMH | DSYH   |      | 605 |
| YP_004464920.1_SwMV   | 451 | FECRVLGALAHRC             | -PSPTLSRLF        | -PEAQPARW             | -VVGSL              | LALAAVPLT  | TALLV     | -RWFL | GPDS  | PQALH  | DQYH | 516 |
| NP_115454.2_MRFV      | 451 | FECQILAGLANRCS            | -PSPFWSRLF        | -PTASPPSW             | -VAYSAL             | LALAAVPLA  | LAL       | -RWFY | GPDS  | PQALH  | DQYH | 516 |
| QCC30252.1_PeDV       | 445 | -----LLLKPLKQAPWLRPLY     | -RDAPVPRF         | -WIKATL               | AAALAAAAA           | AAAL       | -RHFL     | GPDT  | PQMH  | MHDKYV |      | 503 |
| SBuMV-BU1             | 503 | ---RLLPSLSMSLLSKFPVLRFF   | -SDKPIPSW         | -FYYVLC               | SVSSIPL             | LLLLSL     | -RKFC     | GPDS  | PQALL | DNYT   |      | 566 |
| YP_003475889.1_OLV-3  | 569 | ---RILPEFFDALLKKAPFLRPLF  | -SDAPIPSW         | -AWALCAT              | GVAIP               | IIALS      | -RRFL     | GPNS  | PQALL | DEYQ   |      | 632 |
| YP_009551972.1_AVF    | 509 | ---VLSFLLPTSFINQLKFL      | -----QPRSLPKH     | -TLHCTL               | ALASLP              | ILAALY     | -RWFS     | GPDT  | PQALH | DQYE   |      | 568 |
| ATJ00054.1_MsMV1      | 501 | ---ILSKFFPESFLSRFPSL      | -----NPRNLPKS     | -TVPVALL              | LAAIP               | PAFAALY    | -RWFS     | GPDT  | PQALH | DQYE   |      | 560 |
| QQG34652.1_DiMV1      | 619 | ---HPDFNLKPLLLHKIPWLISLL  | -PKAPTPLA         | -ATLFIA               | SMASAI              | PLAFWCH    | -RRFF     | GPDP  | HDPQ  | ALH    | DQYQ | 682 |
| YP_002756536.1_GSyV-1 | 517 | FLHKPLGKLSRLLLNRPFLRRFF   | -PDAPIP           | PTW-ARLLT             | VAIASPA             | VLWLA      | -RHFI     | GPDP  | APQAL | NDHYV  |      | 583 |
| QUS93818.1_GRVfV      | 578 | FSQTVRLTFLTTLANHIPSLKRFL  | -PRLSTPAL         | -LKAAFC               | LGLLTP              | PLLLLLI    | -RSFV     | GPDS  | PQMSD | DAYN   |      | 644 |
| Consensus_aa:         |     | ...p...h...ph..p.         | P.L.phh.s..shs... | hh.h.h.hh.h.hPhhhh.h. | R.Fh                | GPDP       | PQThhDpYp |       |       |        |      |     |
| Consensus_ss:         |     | hhhhhh                    | h                 | hhhhhhhhhhhhhhhhhh    | hhh                 | hhhhhhhhhh |           |       |       |        |      |     |

|                       |     |                                                    |               |         |         |        |          |        |         |        |        |     |
|-----------------------|-----|----------------------------------------------------|---------------|---------|---------|--------|----------|--------|---------|--------|--------|-----|
| Conservation:         |     | 896                                                | 9             | 9       | 7       |        | 8        | 5      |         | 8      |        |     |
| YP_009505639.1_BlVS   | 549 | DLFHPADW                                           | RLI           | FN      | RKPLF   | ASPEP  | ---FLPIT | -----  | TVPA    | --PVD  | -----  | 583 |
| MZ422607.1_GaMV       | 508 | ELFHPPELWRLTLRRSPLAVSAER                           | ---FLPIET     | FTTPE   | -----   | PTPPT  | --PAQE   | ATAET  | PVL     | -----  |        | 559 |
| ADD13602.1_OBDV       | 529 | TMFHPREWRLTLPRGPISGRSS                             | ---FSPLPH     | PPSP    | -----   | TPA    | --PDS    | RAGPLQ | PPSALPS | ----   |        | 580 |
| AYC35261.1_CSDaV      | 596 | AMFHPQPWGLTLTRKAICCDRAP                            | ---FLPIP      | VVPSS   | -----   | DFKA   | --PPT    | PATPL  | TSIPIK  | GVEPQV |        | 653 |
| QLM05437.1_GAMaV      | 593 | AMFHPPDWHLTLDRAPLLTHRQP                            | ---FLSFEP     | QPAP    | -----   | EELL   | --PPT    | AAVRLE | TTPAP   | PPTSAQ | --     | 648 |
| YP_009222597.1_NeVM   | 539 | ALFHPEPWELVLKRGPVHVARAP                            | ---FLPFT      | P       | -----   | VDHV   | --PLD    | SD     | -----   |        |        | 576 |
| MZ305310.1_PGMV       | 508 | ATFHADPWRLILHRGPITVGRRS                            | ---FLPLQ      | DL      | -----   | DTPK   | --PQP    | PDSP   | -----   |        |        | 548 |
| QID59334.1_SbMV       | 531 | ATFHDPDWQLRLXRGPIFCGRRA                            | ---FLPLE      | HA      | -----   | PPAS   | SP       | -----  |         |        |        | 567 |
| QID59002.1_CaMaV      | 619 | AMFHPEPWTLTLDQGPVFCTSTP                            | ---FLPVP      | -----   | TVPT    | --PAA  | ASF      | PDN    | -----   |        |        | 659 |
| QQG34656.1_DiMV2      | 606 | RMFHPELWHLTIERKSGRYSNPAQ                           | ---FLPLD      | FFPQ    | PEPV    | TSKAI  | VSQA     | --PSS  | DVSR    | PLSRL  | LEVQTP | 668 |
| YP_004464920.1_SwMV   | 517 | ATFHDPDSWLDLPRRLRSCVREP                            | ---FLL        | -----   | TGAA    | --PAST | PTS      | AENF   | SPD     | -----  |        | 561 |
| NP_115454.2_MRFV      | 517 | ATFHDPDPWTLDLPRRLRRFERES                           | ---FMR        | -----   | TGSA    | --PLPL | SLP      | -----  |         |        |        | 553 |
| QCC30252.1_PeDV       | 504 | ALFHPPQWQLKIKRGVIKTLPA                             | ---FLPFE      | -----   | PT      | --PPI  | -----    |        |         |        |        | 536 |
| SBuMV-BU1             | 567 | DFHHSKPWTLTLDRAVHVRPSS                             | ---FIPIES     | LPPQ    | APQPLY  | GNSDHL | FHPAET   | PTI    | VPIS    | NPDPSE | PF     | 631 |
| YP_003475889.1_OLV-3  | 633 | SYFHPKPWQLILEQGP                                   | IFANPEP       | ---FSPH | -----   | CQPI   | --PSS    | GPD    | SAP     | SSTL   | GTTPM  | 681 |
| YP_009551972.1_AVF    | 569 | TYFHPKEWTL                                         | SFPRKAITVTRIP | ---FLP  | -----   | TDPI   | --PIS    | DA     | -----   |        |        | 603 |
| ATJ00054.1_MsMV1      | 561 | EYFHPKEWSLFFQRKP                                   | VHVT          | TRSP    | ---FLP  | -----  | QDPI     | --PVS  | NA      | -----  |        | 595 |
| QQG34652.1_DiMV1      | 683 | AYFHPKDWTLTLDRAPL                                  | TTS           | SPQ     | ---FLPF | -----  |          |        |         |        |        | 709 |
| YP_002756536.1_GSyV-1 | 584 | RFFHPDRWQLTFRQPRF                                  | VALDR         | ---TFPW | LPQ     | APE    | -----    | PTEPR  | --DSD   | VPLE   | TVP    | 632 |
| QUS93818.1_GRVfV      | 645 | RYFHPSRWELSLERSPAS                                 | VIPSPPA       | FLPT    | ASAAEP  | -----  | TEPR     | --PSD  | SPL     | -----  |        | 690 |
| Consensus_aa:         |     | .hFHPp.WpL.hpR.sh.h...s..FLPh.....s..h..Ps.ss..... |               |         |         |        |          |        |         |        |        |     |
| Consensus_ss:         |     | hh                                                 | eeeeeeeeee    |         |         |        |          |        |         |        |        |     |

|                       |     |                            |                 |             |           |       |       |      |       |          |         |     |
|-----------------------|-----|----------------------------|-----------------|-------------|-----------|-------|-------|------|-------|----------|---------|-----|
| Conservation:         |     |                            |                 |             | 9         |       |       |      |       | 5        |         |     |
| YP_009505639.1_BlVS   | 584 | -----                      | LPQIE           | ---         | SIAIP     | ----- | AP    | ---- | SPAPP | S        | 602     |     |
| MZ422607.1_GaMV       | 560 | -----                      | APAVP           | ---         | ASTAP     | ----- | SPPS  | PLP  | ASE   | PVQ      | 582     |     |
| ADD13602.1_OBDV       | 581 | -----                      | THEPAPA         | ---         | DLESP     | ----- | APQA  | HAPQ | TE    | PPS      | 605     |     |
| AYC35261.1_CSDaV      | 654 | -----                      | SGEGVPPQSASSTGP | ASDSRRAPQPA | ---       | SSTGP | ---   | DPPT | QNTS  | SAAPQP   | 697     |     |
| QLM05437.1_GAMaV      | 649 | -----                      | VEPPT           | PAEP        | ---       | KSTRP | ----- | APLK | PVL   | VATPPP   | 675     |     |
| YP_009222597.1_NeVM   | 577 | -----                      | SPAIP           | ---         | APPVP     | ----- | QPQA  | PLS  | PV    | TPAP     | 599     |     |
| MZ305310.1_PGMV       | 549 | -----                      | GPPPP           | ---         | SPAGE     | ----- | SES   | ASF  | TPE   | KPAP     | 571     |     |
| QID59334.1_SbMV       | 568 | -----                      | PSPA            | ---         | DKPAT     | ----- | SPVH  | VQT  | PAT   | PPP      | 589     |     |
| QID59002.1_CaMaV      | 660 | -----                      | PPLPV           | ---         | SEVSP     | ----- | QIPL  | QAV  | SP    | SPSQ     | 683     |     |
| QQG34656.1_DiMV2      | 669 | -----                      | SESQ            | KEV         | APSNLTQMP | ----- | QSQ   | KLS  | PA    | EAP      | 698     |     |
| YP_004464920.1_SwMV   | 562 | -----                      | TPRPL           | TS          | LRAQA     | ----- | EPS   | QPS  | D     | VQPPK    | 586     |     |
| NP_115454.2_MRFV      | 554 | -----                      | PPEG            | SLLP        | VEPPL     | ----- | APS   | D    | PE    | PALEP    | 579     |     |
| QCC30252.1_PeDV       | 537 | -----                      | LPSD            | ---         | SSDEE     | ----- | VEER  | FQ   | KL    | API      | 558     |     |
| SBuMV-BU1             | 632 | -----                      | PPPT            | PIEL        | PPFSPKKP  | ----- | VPS   | VSK  | P     | PTSQEP   | 661     |     |
| YP_003475889.1_OLV-3  | 682 | -----                      | YPSS            | PAP         | VE        | ---   | EK    | TIL  | ---   | VPTVR    | ALPAPPP | 709 |
| YP_009551972.1_AVF    | 604 | -----                      | HPEPS           | ---         | ESE       | ----- | IPL   | F    | N     | STPNEHSP | 624     |     |
| ATJ00054.1_MsMV1      | 596 | -----                      | HPDPS           | ---         | ESD       | ----- | IPL   | E    | P     | SSSPLTTP | 616     |     |
| QQG34652.1_DiMV1      | 710 | -----                      | EPIPT           | ---         | QESL      | ----- | NIPS  | NAT  | PAS   | PAP      | 732     |     |
| YP_002756536.1_GSyV-1 | 633 | -----                      | SPLPV           | ---         | VAPLP     | ----- | APAT  | S    | V     | PPVDTSA  | 655     |     |
| QUS93818.1_GRVfV      | 691 | -----                      | VPL             | ---         | ---       | ----- | VP    | S    | R     | LHPDTPPP | 706     |     |
| Consensus_aa:         |     | .....P.ss.....s.....ss.sss |                 |             |           |       |       |      |       |          |         |     |
| Consensus_ss:         |     |                            | eee             |             |           |       |       |      |       |          |         |     |

Conservation: 6 5 8

|                       |     |                                                                          |     |
|-----------------------|-----|--------------------------------------------------------------------------|-----|
| YP_009505639.1_BlVS   | 603 | TS-----LAPTPIPPVTSTLDPAPASASAPAA-----TPPAIAA                             | 636 |
| MZ422607.1_GaMV       | 583 | ALQN----ASPAPAP---PAQLTSLSSSLTPAP-----RDTIFPLASTA                        | 619 |
| ADD13602.1_OBDV       | 606 | PVIEQE--ARPDFFP--APA-----PRP-----APTP-SASA                               | 632 |
| AYC35261.1_CSDaV      | 698 | PIESKVTFAQPIESV--APVVP--AGEP--PQSASSTGP-----ASVSRDPQVASSTTPDAPTLDVSVT    | 757 |
| QLM05437.1_GAMaV      | 676 | PVTAPT--SQPEPTQ--APAAPT-LAIPASPRALQAEADRIHSVQMAADRTPTETIAIVAAADALLPLAAST | 740 |
| YP_009222597.1_NeVM   | 600 | VSRDSPT-SDPPGRDAEEKAVNAVLSLSPSPSQ-----PPVR                               | 635 |
| MZ305310.1_PGMV       | 572 | AATQPQAQAPPVATPAPAEAEIEK-DHPPSVPA-----AAEA                               | 607 |
| QID59334.1_SbMV       | 590 | P-----                                                                   | 590 |
| QID59002.1_CaMaV      | 684 | PDSSPT--PEPVPVPASTPPPPPELSEAPPPA-----VEAPQAPAP                           | 723 |
| QQG34656.1_DiMV2      | 699 | KTSTE---PAPGPVPTIESAVQS-IARALNPDAVHNPD-----VNALKDINSTAEAVRDLLSPICPPS     | 758 |
| YP_004464920.1_SwMV   | 587 | SAVQPQVAPEPAPAP-ISPEPAASLPISAEPE-----VFEPPTSHSP                          | 628 |
| NP_115454.2_MRFV      | 580 | PAA-----SVPAPAP--APA-----SEPPP-----SPESVAP                               | 604 |
| QCC30252.1_PeDV       | 559 | PV-----PQPAP--STATPPQPAATAPPE-----AKPVAQQLIPAAPE                         | 596 |
| SBuMV-BU1             | 662 | AVSNPPAPSSPQPPSTPSTPRYLPPHKASEPK-----LQVHPLPPPS                          | 704 |
| YP_003475889.1_OLV-3  | 710 | SS-----VPPPSKP--SPAAPAPVTPPSLPT-----VIPPLSTPT                            | 743 |
| YP_009551972.1_AVF    | 625 | S-----SSPEPSP--LPAVPPPSAIPVQLP-----TVASNNGPLDKRPSSSLL                    | 667 |
| ATJ00054.1_MsMV1      | 617 | -----ESPESPPLAPTVPPPSAIPTVKLP-----STSSHNPLDKSKPAPSPL                     | 660 |
| QQG34652.1_DiMV1      | 733 | TTQAQEHASTPLDTP--SKPPNPPTSSPTTTP-----CPTSDFVSSDRPHQSPL                   | 780 |
| YP_002756536.1_GSyV-1 | 656 | TTVSAVEPSLSTESL--KTVEAPSGTTILQPRE-----LKDTIFPLPAAA                       | 698 |
| QUS93818.1_GRVFV      | 707 | AE-----KQPEPTPC-VVASAPVLDASAPRA-----EETPAGLDM                            | 741 |
| Consensus_aa:         |     | ss.....P.sss...s..s...s..P.s.....P.sss.                                  |     |
| Consensus_ss:         |     |                                                                          |     |

Conservation: 6 6

|                       |     |                                                                      |     |
|-----------------------|-----|----------------------------------------------------------------------|-----|
| YP_009505639.1_BlVS   | 637 | PA-----PAPEPQAEALSL-----LIPSEHQPAAPPPIP                              | 665 |
| MZ422607.1_GaMV       | 620 | PIAELTAPTA-----PVAEPSAPAPTDGR--PEDFAPPLDPSTVDAALLALGISIPSS           | 670 |
| ADD13602.1_OBDV       | 633 | PS-----PAPTSPAPEPPS-----PTASE-----QAASLIPA--                         | 659 |
| AYC35261.1_CSDaV      | 758 | PPKTIYPIDHLQNDGFCRCSCVCEPLQAPVPSTPLTVS-----DHKEAQDAEALSSALQALGLAPT-- | 819 |
| QLM05437.1_GAMaV      | 741 | PAADSAPE-----PTVVPGPPEEVD-----PAGQA-----ALASLGLAPSLP                 | 777 |
| YP_009222597.1_NeVM   | 636 | P-----PSPSVQAPASSD-----DLADRRDAENLAQALSSGLFTPD                       | 673 |
| MZ305310.1_PGMV       | 608 | P-----PSARPVEPPSET-----QKQESQRPSPSEEAAMLCGERAP--                     | 643 |
| QID59334.1_SbMV       | 591 | -----PSPEPASPEPD-----ADIPTP                                          | 609 |
| QID59002.1_CaMaV      | 724 | PAD-----PSDVPAQAPAVE-----FSFPDPPAETHVASMFGVPTPLD                     | 761 |
| QQG34656.1_DiMV2      | 759 | LASHHQVA-----PASAPAIKTQPP-----TPSQSSDNLQATAMLSTAEVKLD                | 802 |
| YP_004464920.1_SwMV   | 629 | PAQPVADSE-----PTSQPSRRAPT-----VRQAALLGADLRFGLPPRSS                   | 670 |
| NP_115454.2_MRFV      | 605 | PVAVVA-----PAVQPARAPSPS-----PALLGAELRFGDLPPVSA                       | 640 |
| QCC30252.1_PeDV       | 597 | SQETVDAIKRQLADPM-----PALPAEGPSSPRPLSNALLCPPEGSEVLLEAPPADCAVTASPPPGF  | 658 |
| SBuMV-BU1             | 705 | PPVRIPQVGASGFV-----AQDLPAQELPLP-----TLSCELVDLDQQPSTPPSP              | 749 |
| YP_003475889.1_OLV-3  | 744 | PETRVPEVGKSGIV-----ASDLPPTEISFN-----PTLARCPRNFLGLCAPHPNPNPSHP        | 794 |
| YP_009551972.1_AVF    | 668 | TAIIDPSTNA-----PATSSSLPPATT-----NPTPVQSEFPDFPFSFSAQPTAPRI            | 713 |
| ATJ00054.1_MsMV1      | 661 | TSIIDPSTNEPLLKQP-----SLQPVSVPTDPDFDT-----TPSFP                       | 696 |
| QQG34652.1_DiMV1      | 781 | DQFPVPPTD-----PQKGPAPPSTNEHL-FRHPLPKAPDALPENLFPDFFNQPAAPR            | 831 |
| YP_002756536.1_GSyV-1 | 699 | LAVTPPE-----PAPAPAEPVSAS-----TV                                      | 719 |
| QUS93818.1_GRVFV      | 742 | SATTV-----LEAKPPVQVSLV-----DEPPRP                                    | 764 |
| Consensus_aa:         |     | s.....P.s..Ps.....s..ss..                                            |     |
| Consensus_ss:         |     | eee                                                                  |     |

Conservation: 5 5

PRO<sup>[1]</sup>

|                       |     |                                                                  |     |
|-----------------------|-----|------------------------------------------------------------------|-----|
| YP_009505639.1_BlVS   | 666 | -ELLPAAG-----QLQLE---SSGVVSNL-----TPAAPEPA-APEPSP                | 699 |
| MZ422607.1_GaMV       | 671 | DIVLPPSP-----AAAEPIPPPNLSLVQS-----SFGSVAAPVSS-LPAPT              | 711 |
| ADD13602.1_OBDV       | 660 | ---PSS-----ALVVE---PSGVVSAS-----SWGATNQPAD--QVDDSP               | 691 |
| AYC35261.1_CSDaV      | 820 | -PTAPQSQ-----NLTV-----SSGAMHAS-----SWDQLSSPSS--DWDPSP            | 855 |
| QLM05437.1_GAMaV      | 778 | ASTGPSQ-----SANLE---PSGAVHAA-----TWDQSSAPSS--DWDTS               | 813 |
| YP_009222597.1_NeVM   | 674 | -HSEFPQP-----VVG-----SSGELHAR-----EWGQEDAPAS--DPESP              | 707 |
| MZ305310.1_PGMV       | 644 | ---SPPNP-----LLTVE---PTGEVYSR-----EPAGPVTE-DPERVA                | 675 |
| QID59334.1_SbMV       | 610 | VPDAPART-----PVVDE--KTAIISDP-----EPPEPPKP-DPECSE                 | 644 |
| QID59002.1_CaMaV      | 762 | GKPAAPNT-----PLTVE---ERGHVYTT-----APLPEPETPAASDP                 | 796 |
| QQG34656.1_DiMV2      | 803 | QHLES-----NLHLE---PKGHVFS-----EPSWAE-VEGLSP                      | 833 |
| YP_004464920.1_SwMV   | 671 | WAQDPELS-----PLGES---TQGTVFAG-----IPTPRE-ESALAR                  | 704 |
| NP_115454.2_MRFV      | 641 | WSDDPEIS-----KLGES---TQGTVFAG-----TPGPRAP-EPDTAR                 | 674 |
| QCC30252.1_PeDV       | 659 | TSSAAPSA-----PSQPE--APAQIEAFSSLLYGQDSISVQRDGSVVGAAHTTPEPL-SEEVSA | 713 |
| SBuMV-BU1             | 750 | PPASPS-----PLVTD---DLGTVSAS-----RPKLDPT-ETTFSE                   | 781 |
| YP_003475889.1_OLV-3  | 795 | EPSAPS-----PLITD---PSGSLTAI-----NPLEPPEF-EFNHAL                  | 826 |
| YP_009551972.1_AVF    | 714 | VPACPPGF-----ENILSD--KFGALNSS-----TAPAEHPSEPSTP                  | 749 |
| ATJ00054.1_MsMV1      | 697 | APRPPPGF-----ERVSD--KHGVITES-----NLPHEPESHVEVSP                  | 732 |
| QQG34652.1_DiMV1      | 832 | SSSAPPASVNLRPQTFFVKPIQPQD-CETGNIIPP-----PEVLIPLAKPD-PPASP        | 882 |
| YP_002756536.1_GSyV-1 | 720 | LGTAPLSR-----DL-----HTGHVSTP-----ATEPGLV-EPEHSP                  | 750 |
| QUS93818.1_GRVFV      | 765 | ESLLNPSAT-----QEELLIS--HTGTLTHT-----TPQPVTA-TPEVEP               | 801 |
| Consensus_aa:         |     | ...s.....h..p....t..l.s.....s.s.....t.                           |     |
| Consensus_ss:         |     |                                                                  |     |

|                       |     | PRO I                                                                  |           |         |          |          |          |        |         |           |         |        |        |       |       |      |    |    |   |    |     |
|-----------------------|-----|------------------------------------------------------------------------|-----------|---------|----------|----------|----------|--------|---------|-----------|---------|--------|--------|-------|-------|------|----|----|---|----|-----|
|                       |     | ★                                                                      |           |         |          |          |          |        |         |           |         |        |        |       |       |      |    |    |   |    |     |
| Conservation:         |     | 9                                                                      | 9         | 77      | 865      | 6        | 6        | 8      | 7       | 56        | 9       | 9      | 9      | 6     | 69    | 6999 | 66 | 66 | 6 | 98 | 8   |
| YP_009505639.1_BlVS   | 700 | LQADSSARGPV                                                            | QLFSEL    | FPGS    | -YIGTTGA | FNSRY    | RASGRAP  | TPYP   | AGTD    | CLLV      | TVSEATH | IPRED  | LWSAL  |       |       |      |    |    |   |    | 768 |
| MZ422607.1_GaMV       | 712 | LESPTAAGPI                                                             | SMSFSE    | LPAS    | -YLGTS   | GSFLCRR  | RASGRCS  | LPYP   | MDCL    | LVTVSEATH | IPRED   | LWSAL  |        |       |       |      |    |    |   |    | 779 |
| ADD13602.1_OBDV       | 692 | LARDPSASGP                                                             | VRFYRDL   | FPAN    | -YAGDS   | GTDFDR   | FRASGRS  | PTYP   | MDCL    | LVATEQ    | ATRIS   | REAL   | WDCL   |       |       |      |    |    |   |    | 759 |
| AYC35261.1_CSDaV      | 856 | LARDSSASGP                                                             | PGMYSDL   | FPAP    | -YLPGT   | GQFIFR   | SRANRANI | PYPD   | MDCL    | LLSIEQ    | ATRLP   | KREAL  | WDTL   |       |       |      |    |    |   |    | 923 |
| QLM05437.1_GAMaV      | 814 | LGRDGSANGP                                                             | IALYSEL   | HPAN    | -YLPST   | GDGFLFR  | DRANRAN  | LPYPT  | MDCL    | LVAVEQ    | ATRIP   | KREAL  | WDTL   |       |       |      |    |    |   |    | 881 |
| YP_009222597.1_NeVM   | 708 | LLRDPSACGP                                                             | VAMYSEL   | HPGN    | -YVPGT   | GFLQFR   | DRASGRAP | VPYPS  | MDCL    | LVAVEQ    | ATRLP   | KREAL  | WDTL   |       |       |      |    |    |   |    | 775 |
| MZ305310.1_PGMV       | 676 | LQIDPTADGP                                                             | IGLYSEL   | HPDC    | -YEPRT   | GDGFLARN | RNRSSR   | SDLEY  | PSGVD   | CLLKAVA   | QATNIS  | VQAL   | WTTL   |       |       |      |    |    |   |    | 744 |
| QID59334.1_SbMV       | 645 | LERDPSAAGP                                                             | ALPYDELY  | PDC     | -YTELS   | AKFLSR   | ARNALS   | SAAPY  | PAGVD   | CLLTAV    | SEATGL  | QTQAL  | WECL   |       |       |      |    |    |   |    | 713 |
| QID59002.1_CaMaV      | 797 | LGSDPSASGP                                                             | PIAFFRELY | PAS     | -WLNQ    | SGLFLCR  | SRNSSR   | SSHYP  | PS      | NDCL      | LLAAV   | SEATS  | IPRETL | WETL  |       |      |    |    |   |    | 864 |
| QQG34656.1_DiMV2      | 834 | LQSDGSARGP                                                             | VAFFSQVH  | PGS     | -YIGTT   | GQFNFR   | ASRSPSS  | KQSY   | PVNTD   | CLLRAVE   | AGSGIS  | RQAL   | WECL   |       |       |      |    |    |   |    | 902 |
| YP_004464920.1_SwMV   | 705 | LEVDP                                                                  | TASGP     | IMEFRDL | QPG      | L        | YLGTT    | GSFLTR | ARNVSS  | STIQY     | PARAAC  | LLVAV  | RNATSL | PLTAT | LWAAL |      |    |    |   |    | 773 |
| NP_115454.2_MRFV      | 675 | LDADPSASGP                                                             | VMFREL    | QKGA    | -YIEPT   | GAFLTR   | ARNVSS   | SSSI   | PIYP    | TRAA      | CLLVAV  | SQATGL | PLTRT  | LWAAL |       |      |    |    |   |    | 743 |
| QCC30252.1_PeDV       | 714 | LVRDPSAAGP                                                             | VLQFHD    | LHPGA   | -YLEATA  | AAPFCRL  | RNGQPS   | NMPYP  | Q       | NDCL      | LRTVHT  | ATHI   | PLAAL  | RECL  |       |      |    |    |   |    | 781 |
| SBuMV-BU1             | 782 | LVDPSASGP                                                              | VSSFSELY  | PNQ     | -WCPGS   | ATFPAR   | VNRSSH   | STSPY  | PG      | MDCL      | LLKAIS  | IPTGL  | STKSL  | WESL  |       |      |    |    |   |    | 849 |
| YP_003475889.1_OLV-3  | 827 | LGADPSGQGP                                                             | VQAQFNL   | FPSTL   | WLQGT    | GFEFLTR  | SRVQAP   | SSAPY  | P       | MDCL      | LHAIHT  | ATRI   | PKPTL  | WAGL  |       |      |    |    |   |    | 895 |
| YP_009551972.1_AVF    | 750 | LLADQSAQGP                                                             | VVMFGL    | YPAE    | -YHSNC   | DEFQTR   | ARVNHSS  | NLPR   | VIND    | CLLEAV    | SSATN   | ISKDAL | WNAL   |       |       |      |    |    |   |    | 818 |
| ATJ00054.1_MsMV1      | 733 | LMADSSAEGP                                                             | VPVLFGL   | YPAE    | -YHANC   | DEFQTR   | RRVDHSS  | SLPR   | PSVND   | CLLEAV    | SSATN   | ITKDAL | WNAL   |       |       |      |    |    |   |    | 801 |
| QQG34652.1_DiMV1      | 883 | LLADPTATSD                                                             | VKLWSEHL  | PRE     | -YLSNC   | GSFLFR   | ERSTPAS  | DL     | PYPSTTD | CLLQAV    | SKATG   | IDPHAL | WRTL   |       |       |      |    |    |   |    | 951 |
| YP_002756536.1_GSyV-1 | 751 | LAADSSATGE                                                             | VSEFFNL   | LHPAD   | -WIAPT   | ATFLARR  | RGETI    | SGAKY  | P       | MDCL      | LLAAV   | SAGANI | PKDAL  | WKTI  |       |      |    |    |   |    | 818 |
| QUS93818.1_GRVFV      | 802 | LMVDASGAGP                                                             | VDSFSLVH  | PGS     | -YLPFS   | GSFLSR   | IRVSSL   | SPAPY  | P       | LDCL      | LVSVAG  | ATGF   | PKESL  | WQSL  |       |      |    |    |   |    | 869 |
| Consensus_aa:         |     | L..DsoA.GP1..@.pL@Ps..@h.sot.F.hR.Rsss.SshPYPs..DCLL.tlp.AT.ls.psLWphL |           |         |          |          |          |        |         |           |         |        |        |       |       |      |    |    |   |    |     |
| Consensus_ss:         |     | eehhhhh eeeee hh hhhhhhhhh hhhhhhhh                                    |           |         |          |          |          |        |         |           |         |        |        |       |       |      |    |    |   |    |     |

|                       |     |                                                                     |    |   |      |    |    |   |   |   |   |   |    |    |   |   |   |   |   |   |   |   |   |   |   |   |   |   |   |   |   |   |   |   |   |   |   |   |   |   |   |   |   |   |   |   |   |   |   |   |   |   |   |   |       |      |       |       |       |       |      |      |      |     |
|-----------------------|-----|---------------------------------------------------------------------|----|---|------|----|----|---|---|---|---|---|----|----|---|---|---|---|---|---|---|---|---|---|---|---|---|---|---|---|---|---|---|---|---|---|---|---|---|---|---|---|---|---|---|---|---|---|---|---|---|---|---|---|-------|------|-------|-------|-------|-------|------|------|------|-----|
| Conservation:         |     | 6996                                                                | 8  | 6 | 9959 | 97 | 97 | 5 | 8 | 6 | 6 | 6 | 95 | 66 | 9 | 6 | 8 |   |   |   |   |   |   |   |   |   |   |   |   |   |   |   |   |   |   |   |   |   |   |   |   |   |   |   |   |   |   |   |   |   |   |   |   |   |       |      |       |       |       |       |      |      |      |     |
| YP_009505639.1_BlVS   | 769 | VTNLPDCLLA                                                          | PC | E | I    | S  | K  | H | G | L | S | T | D  | H  | F | A | V | L | A | F | F | Y | S | L | R | V | T | F | L | T | S | H | G | P | V | D | L | G | M | S | D | A | T | T | N | F | R | I | D | H | Q | P | E | S | K     | D    | L     | ----  | 834   |       |      |      |      |     |
| MZ422607.1_GaMV       | 780 | CVNLPDSMLDAD                                                        | T  | I | R    | A  | G  | L | S | T | D | H | L  | V  | V | L | A | R | F | F | N | F | R | A | T | L | D | L | K | P | S | P | V | T | Y | G | L | S | D | S | P | V | H | F | H | I | T | Y | T | P | E | S | H | T | A     | D    | G     | F     | K     | ----  | 849  |      |      |     |
| ADD13602.1_OBDV       | 760 | TATCPDSFLDPK                                                        | S  | I | A    | H  | G  | L | S | T | D | H | F  | V  | I | L | A | H | R | F | S | I | C | A | N | F | H | S | A | A | H | V | I | Q | L | G | M | A | D | A | T | S | T | F | M | I | N | H | T | A | G | S | A | G | L     | ---- | 825   |       |       |       |      |      |      |     |
| AYC35261.1_CSDaV      | 924 | CAACPD                                                              | S  | L | L    | D  | P  | D | I | I | R | R | V  | G  | L | S | T | D | H | F | A | I | L | A | H | H | S | L | R | C | F | H | T | A | H | G | V | I | E | L | G | M | A | D | A | T | S | S | F | D | I | D | H | T | A     | G    | N     | ----- | 986   |       |      |      |      |     |
| QLM05437.1_GAMaV      | 882 | CATCPDSMLRP                                                         | E  | D | I    | R  | R  | E | G | L | S | T | D  | H  | F | A | V | L | A | H | H | S | L | A | A | D | F | H | S | A | S | G | I | I | P | I | G | M | A | D | A | S | A | K | F | A | I | T | H | T | A | G | S | G | S     | A    | ----  | 947   |       |       |      |      |      |     |
| YP_009222597.1_NeVM   | 776 | TSACPD                                                              | S  | F | L    | N  | P  | T | E | I | A | A | A  | G  | L | S | T | D | H | F | A | I | L | A | R | H | Y | S | L | R | A | T | F | H | S | G | P | S | T | F | T | I | G | M | E | D | A | T | S | T | F | A | I | N | H     | T    | P     | G     | Q     | G     | K    | L    | ---- | 841 |
| MZ305310.1_PGMV       | 745 | TAELPD                                                              | S  | M | L    | N  | P  | I | E | V | Q | T | H  | G  | L | S | T | D | H | F | V | L | A | R | I | Y | R | L | R | A | F | L | T | K | F | G | D | I | T | L | G | V | E | N | A | T | S | S | F | T | I | R | H | T | G     | E    | Y     | A     | G     | ----  | 809  |      |      |     |
| QID59334.1_SbMV       | 714 | CSQLPD                                                              | S  | Q | L    | G  | D  | D | I | S | K | G | L  | T  | D | H | F | V | L | A | R | I | Y | R | L | R | A | T | F | H | T | A | G | E | V | T | L | G | M | A | D | A | T | S | S | F | H | I | Q | H | T | A | G | N | ----- | 776  |       |       |       |       |      |      |      |     |
| QID59002.1_CaMaV      | 865 | ITTLPD                                                              | S  | L | L    | D  | S  | S | E | I | R | V | H  | G  | L | S | T | D | H | F | C | V | L | A | M | H | S | L | R | A | R | F | I | S | E | G | I | D | A | E | L | G | L | E | N | A | V | H | T | F | T | I | N | H | F     | P    | G     | K     | D     | G     | S    | ---- | 930  |     |
| QQG34656.1_DiMV2      | 903 | CNTCPD                                                              | S  | L | I    | D  | P  | K | E | I | E | V | H  | G  | L | S | T | D | H | F | A | I | L | A | R | A | F | S | L | K | C | T | F | I | T | K | D | L | R | V | D | L | G | M | H | D | A | T | T | S | F | S | I | D | H     | T    | P     | G     | S     | ----- | 965  |      |      |     |
| YP_004464920.1_SwMV   | 774 | AANLPD                                                              | S  | I | L    | D  | G  | S | L | V | R | L | G  | T  | T | D | H | F | A | V | L | A | R | I | F | S | L | R | C | F | R | V | S | D | H | I | D | V | E | L | G | V | A | D | A | T | S | R | F | T | I | R | H | T | ----- | 833  |       |       |       |       |      |      |      |     |
| NP_115454.2_MRFV      | 744 | CANLPD                                                              | S  | V | L    | D  | D  | G | S | L | A | T | L  | G  | L | T | D | H | F | A | V | L | A | R | I | F | S | L | R | C | F | V | S | E | H | D | G | V | E | L | G | M | A | D | A | T | S | R | F | T | I | R | H | T | ----- | 803  |       |       |       |       |      |      |      |     |
| QCC30252.1_PeDV       | 782 | CVQLPD                                                              | S  | V | L    | D  | Y  | E | L | I | Q | R | R  | G  | L | S | T | D | H | F | S | V | L | A | R | F | F | S | L | R | A | K | F | L | T | P | G | W | E | Q | P | L | G | M | A | D | T | A | T | H | T | F | V | L | H     | T    | P     | T     | A     | T     | ---- | 847  |      |     |
| SBuMV-BU1             | 850 | CATLPD                                                              | S  | F | L    | S  | P  | S | V | I | A | S | H  | G  | L | N | T | D | H | F | C | A | L | A | H | N | F | S | L | Q | C | H | F | H | S | G | S | N | I | Q | T | M | G | L | T | N | A | S | H | V | F | H | I | T | H     | D    | P     | P     | T     | P     | L    | Q    | ---- | 915 |
| YP_003475889.1_OLV-3  | 896 | CSNLPD                                                              | S  | F | L    | D  | P  | Q | L | I | A | H | K  | G  | L | S | T | D | H | F | A | V | L | A | R | L | F | S | L | R | C | T | F | Q | S | R | S | G | T | Q | T | M | G | V | A | D | A | T | H | F | R | I | R | T | P     | P    | T     | E     | D     | A     | ---- | 961  |      |     |
| YP_009551972.1_AVF    | 819 | CTHLPD                                                              | H  | F | L    | D  | H  | N | D | I | V | R | R  | G  | L | N | T | K | H | L | T | L | C | F | V | Y | K | L | S | T | I | N | T | E | G | R | S | H | L | F | G | L | K | N | S | T | H | F | N | L | D | H | N | P | E     | G    | ----- | 881   |       |       |      |      |      |     |
| ATJ00054.1_MsMV1      | 802 | CTHLPD                                                              | S  | F | L    | Q  | H  | E | D | V | L | R | A  | G  | L | N | T | K | H | L | V | L | C | V | Y | K | L | S | T | I | N | T | E | G | R | S | H | L | F | G | V | K | N | S | T | H | F | N | L | D | H | D | P | R | ----- | 864  |       |       |       |       |      |      |      |     |
| QQG34652.1_DiMV1      | 952 | TSHLPD                                                              | S  | L | L    | D  | T  | A | E | I | T | Q | H  | L  | N | T | D | H | F | T | V | L | A | S | I | Y | D | L | K | C | T | F | L | T | N | H | G | P | I | E | F | G | V | A | N | A | P | T | S | F | T | I | R | H | T     | P    | P     | T     | S     | N     | A    | ---- | 1017 |     |
| YP_002756536.1_GSyV-1 | 819 | CSYFPD                                                              | S  | M | L    | R  | E  | E | D | I | A | K | H  | G  | L | S | T | H | H | F | A | L | A | R | E | H | R | L | Q | A | T | F | H | S | A | G | N | Q | F | V | L | G | V | E | H | P | S | V | S | F | H | I | D | H | T     | P    | E     | S     | A     | T     | A    | ---- | 884  |     |
| QUS93818.1_GRVFV      | 870 | CGILPD                                                              | S  | Q | L    | D  | N  | E | Q | V | R | T | Q  | G  | L | S | T | D | H | F | C | A | L | A | L | H | S | L | R | C | T | F | L | T | D | A | G | Q | Q | E | M | G | M | E | D | A | T | S | V | F | T | I | R | H | T     | S    | G     | N     | ----- | 932   |      |      |      |     |
| Consensus_aa:         |     | hs.hPDSHlp..pl.p.GLSTcHFhhLA.h@pLptpFho.....hGh.sAsppFpIpHhs.s..... |    |   |      |    |    |   |   |   |   |   |    |    |   |   |   |   |   |   |   |   |   |   |   |   |   |   |   |   |   |   |   |   |   |   |   |   |   |   |   |   |   |   |   |   |   |   |   |   |   |   |   |   |       |      |       |       |       |       |      |      |      |     |
| Consensus_ss:         |     | hhh hhh hhhh hhhhhhhhhhh eeeeeee eeeee eeeee eeeee hhh              |    |   |      |    |    |   |   |   |   |   |    |    |   |   |   |   |   |   |   |   |   |   |   |   |   |   |   |   |   |   |   |   |   |   |   |   |   |   |   |   |   |   |   |   |   |   |   |   |   |   |   |   |       |      |       |       |       |       |      |      |      |     |

|                       |      | PRO II                                                             |        | CS   |             | HEL <sup>[1]</sup> |     |         |             |            |           |         |           |            |           |            |           |     |           |           |           |     |
|-----------------------|------|--------------------------------------------------------------------|--------|------|-------------|--------------------|-----|---------|-------------|------------|-----------|---------|-----------|------------|-----------|------------|-----------|-----|-----------|-----------|-----------|-----|
|                       |      | ★                                                                  |        |      |             | →                  |     |         |             |            |           |         |           |            |           |            |           |     |           |           |           |     |
| Conservation:         |      | 5999                                                               | 5      | 6    | 75          | 6                  | 78  | 5       | 8           | 996        | 59        | 5       | 7         | 6          | 99999     | 699899     |           |     |           |           |           |     |
| YP_009505639.1_BlVS   | 835  | MGH                                                                | FSLH   | ---- | QDSKPVPT    | LNGGT              | --  | GSEL    | ATAAT       | RFNL       | -DGCLLP   | FNTVHT  | FVT       | AP         | SRA       | KNLISNMKN  | 896       |     |           |           |           |     |
| MZ422607.1_GaMV       | 850  | PGH                                                                | FALS   | ---- | TARPAN      | LNGGL              | --  | APDL    | ATAALRFNT   | -GGALLPFHT | VHTYTT    | Q       | PAR       | AKNLISNMKN |           | 909        |           |     |           |           |           |     |
| ADD13602.1_OBDV       | 826  | PGH                                                                | FSLR   | ---- | LGDQPRAL    | LNGGL              | --  | AQDL    | AVAALRFNI   | -SGDLLPTR  | SVHTYRSW  | PKRA    | KNLVSNMKN |            | 886       |            |           |     |           |           |           |     |
| AYC35261.1_CSDaV      | 987  | PGH                                                                | FSLR   | ---- | QSATPR      | LNGGI              | --  | AQDL    | AVAALRFNI   | -DGTLLPIRS | VHVYSTW   | PKRA    | KNLSSNMKN |            | 1046      |            |           |     |           |           |           |     |
| QLM05437.1_GAMaV      | 948  | PGH                                                                | FALR   | ---- | LPDSPK      | LNGGL              | --  | AQDL    | AVAALRFNH   | -SGALLPFR  | TAHPYTTW  | PRRA    | KNLSSNMKN |            | 1007      |            |           |     |           |           |           |     |
| YP_009222597.1_NeVM   | 842  | PGH                                                                | FSLR   | ---- | LDHNSPK     | LNGGL              | --  | AQDL    | AVAALRFNV   | -DGQLLP    | IRS       | VHSYRTW | PAR       | AKNLISNMKN |           | 902        |           |     |           |           |           |     |
| MZ305310.1_PGMV       | 810  | MGH                                                                | FELV   | ---  | ADTETSLPPP  | INGGG              | --  | AEDL    | AAAIMRYHAP  | DGTVLP     | I         | FQVH    | TRVTKP    | PRRA       | KNLVSNMKN | 874        |           |     |           |           |           |     |
| QID59334.1_SbMV       | 777  | PGH                                                                | FALIRP | PPTD | LASTLIPK    | VNNGG              | --  | ARDLESS | IKAFRAKDGSL | PLFLK      | VHQYTTD   | PS      | RA        | KNLISNMKN  |           | 843        |           |     |           |           |           |     |
| QID59002.1_CaMaV      | 931  | IGH                                                                | FALK   | ---- | TPAHASK     | LNGGL              | --  | ADDL    | AAAALRFRTK  | GGHFLP     | FR        | EAHYKSS | P         | RA         | KNLISNMKN | 992        |           |     |           |           |           |     |
| QQG34656.1_DiMV2      | 966  | PGH                                                                | FEFC   | ---- | PNPALT      | LTGSL              | --  | ADDL    | AHAALRFNI   | -KGVLLPFNT | VHHYHSKPS | RA      | KNLISNMKN |            | 1025      |            |           |     |           |           |           |     |
| YP_004464920.1_SwMV   | 834  | PGH                                                                | FELV   | ---- | ADDYSLPAL   | V                  | GAS | TIPGAD  | LAESCKRFV   | ASDR       | TVLP      | FRD     | VHIHRT    | S          | V         | KRA        | KNLISNMKN | 899 |           |           |           |     |
| NP_115454.2_MRFV      | 804  | PGH                                                                | FELV   | ---- | ADNFSLPAL   | V                  | GAS | TIPGAD  | LAEACKRFV   | APDR       | TVLP      | FRD     | VHIHRT    | D          | V         | RA         | KNLISNMKN | 869 |           |           |           |     |
| QCC30252.1_PeDV       | 848  | IGH                                                                | FELV   | ---- | ADGTSAPPPAL | LSGAG              | --  | AKDL    | AI          | I          | ALSFR     | T       | -GGHLLP   | IAHVNHY    | TAPS      | RA         | KNLISNMKN | 911 |           |           |           |     |
| SBuMV-BU1             | 916  | PGH                                                                | FTYL   | ---- | PTGNSV      | LTGAF              | --  | AEDL    | AQIALMFRV   | -HDHLLP    | FR        | T       | VHTYR     | THP        | IR        | AKNLVSNMKN | 975       |     |           |           |           |     |
| YP_003475889.1_OLV-3  | 962  | PGH                                                                | FEYM   | ---- | EEIPES      | LTGAF              | --  | AQDL    | AHFALSFRF   | -NGYLLP    | F         | KHVHTY  | T         | S          | N         | V          | S         | RA  | KNLISNMKN | 1021      |           |     |
| YP_009551972.1_AVF    | 882  | IGH                                                                | FSHS   | ---- | TRPSHI      | QLNGAR             | --  | AQDL    | SHTILG      | FRCS       | SDSTLLP   | F       | KNIH      | S          | Y         | T          | H         | V   | S         | RA        | KNLISNMKN | 943 |
| ATJ00054.1_MsMV1      | 865  | IGH                                                                | FTHS   | ---- | TKVQ        | PVTLNGAR           | --  | AQDL    | KHTILG      | FRCS       | SDSTILP   | F       | KNIH      | S          | Y         | T          | H         | V   | RA        | KNLISNMKN | 926       |     |
| QQG34652.1_DiMV1      | 1018 | PGH                                                                | FELV   | ---- | SDAQPK      | LNGSR              | --  | ADTL    | QHIMK       | SFRS       | -DNALLP   | FQKFHTY | MSN       | TR         | AKNLISNLK |            | 1078      |     |           |           |           |     |
| YP_002756536.1_GSYV-1 | 885  | PGH                                                                | FSLR   | ---- | ADERQHS     | PRLLGGR            | --  | AADLV   | HAALKFKV    | -GSAVLP    | FQQAHDY   | T       | N         | V          | RA        | KNLISNMKN  | 947       |     |           |           |           |     |
| QUS93818.1_GRVFV      | 933  | PGH                                                                | FELV   | ---- | RSSARPL     | LNGAR              | --  | PAAD    | I           | VEHMK      | R         | FKV     | -DGKILP   | F          | CEAHSY    | T          | SHV       | RA  | KNLISNMKN | 994       |           |     |
| Consensus_aa:         |      | .GHFph.....s.s..LsGt...t.DLs.hhb.Fph.sshlLPphppH.Ypo.s.RAKNLISNMKN |        |      |             |                    |     |         |             |            |           |         |           |            |           |            |           |     |           |           |           |     |
| Consensus_ss:         |      | ee hhhhhhhhhh eee hhhhhhhhhhhh                                     |        |      |             |                    |     |         |             |            |           |         |           |            |           |            |           |     |           |           |           |     |



|                       |      | MarBox-like                                                                                                                                                                                                      | HEL I | HEL Ia |      |
|-----------------------|------|------------------------------------------------------------------------------------------------------------------------------------------------------------------------------------------------------------------|-------|--------|------|
| Conservation:         |      | 9999779 559 6 69 55 89 5866 67 6 9697899799997 97 99 8 75789                                                                                                                                                     |       |        |      |
| YP_009505639.1_BlVS   | 897  | GFDGVLANIDPHHTSTARDRLCLDGIIDVAKPRVRLFHIAAGFAGCGKSYPIARLLKTPLFREFKVAVP                                                                                                                                            |       |        | 966  |
| MZ422607.1_GaMV       | 910  | GFDGILASIDPAHPSEARARLLTLDGVMVASPRSVRLIHLAGFAGCGKSYPIVSRLLKTATFKDFKLSVP                                                                                                                                           |       |        | 979  |
| ADD13602.1_OBDV       | 887  | GFDGVMASINPIRPSDAREKIVALDGLLDIAQPRSVRLIHIAGFPGCGKSTPIAKLLHTAAFRDFKLAVP                                                                                                                                           |       |        | 956  |
| AYC35261.1_CSDaV      | 1047 | GFDGIMANIHTPTKTNESREKILALDSQLDIAVRRSVRLIHIAGFPGCGKSFPISRLLRTPTFRNFKVAVP                                                                                                                                          |       |        | 1116 |
| QLM05437.1_GAMaV      | 1008 | GFDGVMATINPAKPSDAREKIIALDSSLDIAAPRSVRLIHIAGFPGCGKSYPIARLLSTPAFRNFKVAVP                                                                                                                                           |       |        | 1077 |
| YP_009222597.1_NeVM   | 903  | GFDGVMANIHTPTKTTEARERILALDQGLDIAQPRTVRLIHIAGFPGCGKSYPIISRLLKTAAFKDHKVAVP                                                                                                                                         |       |        | 972  |
| MZ305310.1_PGMV       | 875  | GFDGIMANVDPAPHPNFAREQILKLDGVLDISVPRKVRVLVHIAGFAGCGKSWPIAKLLTTPSFRNHKIAVP                                                                                                                                         |       |        | 944  |
| QID59334.1_SbMV       | 844  | GFDGVLANIDPTHNTARDRILALDGVMDIAQPRSLKLVIHIAGFAGCGKSWPIAGLLNSPAFHNEKVAVP                                                                                                                                           |       |        | 913  |
| QID59002.1_CaMaV      | 993  | GFDGVMANVDPGHAQEARTRILSLDGVMDISCPNRVRLVHLAGFAGCGKSWPIAQLLKTPTNFRNFKVAVP                                                                                                                                          |       |        | 1062 |
| QQG34656.1_DiMV2      | 1026 | GFDGILANADPLHTNEARDRLSLDGIIDISMPKHVRLVHIAGFAGCGKSYVPVKLLKSPSFKNFKLSVP                                                                                                                                            |       |        | 1095 |
| YP_004464920.1_SwMV   | 900  | GFDGVMAQANPLDPKSAERERFLMLDSCLDIAAPRVRLIHIAGFAGCGKSWPVAQLLKTPTAFRTFKLAVP                                                                                                                                          |       |        | 969  |
| NP_115454.2_MRFV      | 870  | GFDGVMAQANPLDPKSAERERFLMLDSCLDIAAPRVRLIHIAGFAGCGKSWPISHLLRTPTAFRVFKLAVP                                                                                                                                          |       |        | 939  |
| QCC30252.1_PeDV       | 912  | GFDGVLANIDPHRTHEARDRLLALDGIIMDLAPPRQVALIHIAGFAGCGKSYPIQKLLSHPAFHQHKVALP                                                                                                                                          |       |        | 981  |
| SBuMV-BU1             | 976  | GFDGVMASADPQNPKLARERILSLDGVLDIATPRSVRLIHIAGFPGCGKTYPIITRLLSHPSFRNFRVAVP                                                                                                                                          |       |        | 1045 |
| YP_003475889.1_OLV-3  | 1022 | GFDGVMASADPLHPGQTRERFLSMDNQLDIAVPRETRLIHISGFAGCGKTYPIITQLLKKPVFRQFRVAVP                                                                                                                                          |       |        | 1091 |
| YP_009551972.1_AVF    | 944  | GFDGVMANVDPPLHPSKARDSFLMLDQLLDVAASKSVSLVHLAGFAGCGKSYVPVQQLLKTPTAFQNFVKVSV                                                                                                                                        |       |        | 1013 |
| ATJ00054.1_MsMV1      | 927  | GFDGVMANVDPPLHPNKAARDSFLMLDQLLDVAAPKNVHLVHLAGFAGCGKSYVPVQQLLRTPTSFQNFVKVSV                                                                                                                                       |       |        | 996  |
| QQG34652.1_DiMV1      | 1079 | GFDGIMATVNPQDPNKAARHFFMALDHQMDIAAPRQVHLVHLAGFAGCGKSYPIQQLLQHSFRSSRVAVP                                                                                                                                           |       |        | 1148 |
| YP_002756536.1_GSyV-1 | 948  | GFDGVLANIDPAHTNESRDRLSLDGMAMIAAPRDVKLIHIAGFPGCGKSYPIAQLLKSRAFKHFKIAVP                                                                                                                                            |       |        | 1017 |
| QUS93818.1_GRVfV      | 995  | GFDGVLANIDPQHTNEARDRLSLDGSLDIAKPTVSLIHIAGFAGCGKSYPIQQLLTKPCRNKYIAVP                                                                                                                                              |       |        | 1064 |
| Consensus_aa:         |      | GFDG <sup>h</sup> l <sup>h</sup> ashsP. +sppAR-phL. LDs. h <sup>h</sup> Lt. PR <sup>h</sup> VpL <sup>h</sup> l <sup>h</sup> AGFsGCGK <sup>h</sup> oP <sup>h</sup> l. pLLppssF+p <sup>h</sup> K <sup>h</sup> LAVP |       |        |      |
| Consensus_ss:         |      | eeee hhhhhhhhhh eeeeeee hhhhhhhhhhhh eeeee                                                                                                                                                                       |       |        |      |

|                       |      | HEL Ia                                                                                                              | HEL II | HEL III |      |
|-----------------------|------|---------------------------------------------------------------------------------------------------------------------|--------|---------|------|
| Conservation:         |      | 77999 999 5 99 799998999 786898997997999969966785 668                                                               |        |         |      |
| YP_009505639.1_BlVS   | 967  | TVELRAEWKDLLKIRPGAQWRSLSTWESSLLKSARILVIDEVYKMPRGYDLAVHADPT-----IELVIL-                                              |        |         | 1030 |
| MZ422607.1_GaMV       | 980  | TTELNRNEWKIGILNLPAGSQWRSLSTWESSLLKSARILVIDEVYKMPRGYDLDCIHADPT-----VEFVIA-                                           |        |         | 1043 |
| ADD13602.1_OBDV       | 957  | TTELNRSEWKELMKLSPSQAWRFGTWESSLLKSARILVIDEVYKMPRGYDLAIHSDS-----IEFVIA-                                               |        |         | 1020 |
| AYC35261.1_CSDaV      | 1117 | TVELRAEWKTITGLPASEAWRIGTWESSLLKSARVLVIDEVYKMPRGYDLAIHSDPT-----IEMVIA-                                               |        |         | 1180 |
| QLM05437.1_GAMaV      | 1078 | TVELRAEWKDLLKLPNAAWRIGTWESSLLKMARVLVIDEVYKMPRGYDLAIHADPT-----IEMVIA-                                                |        |         | 1141 |
| YP_009222597.1_NeVM   | 973  | TTELRAEWKDMKLKPSPAHVWRIGTWESSLLKAARVLVIDEVYKMPRGYDLAIHADPT-----IEFVIA-                                              |        |         | 1036 |
| MZ305310.1_PGMV       | 945  | TVELRAEWKALMDPRQDKWRFGTWESSLLKSARVLVIDEVYKMPRGYDLAIHADAA-----VEFVIL-                                                |        |         | 1008 |
| QID59334.1_SbMV       | 914  | TVELRTEWKDLLQSKPMDRWRVGTWESSLLKSARVLVIDEVYKMPRGYDLALHADSN-----VDFVIL-                                               |        |         | 977  |
| QID59002.1_CaMaV      | 1063 | TVELRTEWKELLSSPSEWRVGTWESSLLKSARVLVIDEVYKMPRGYDLAIHSDS-----VEFVFA-                                                  |        |         | 1126 |
| QQG34656.1_DiMV2      | 1096 | TVELRSEWKELNLKKGQEWVGTWESCLLSARVLVIDEVYKMPRGYDLDSIHADPA-----LEFVLIV-                                                |        |         | 1159 |
| YP_004464920.1_SwMV   | 970  | TTELRDEWKGLMEPRDQDKWRFGTWESSLLKSARTVLVIDEVYKMPRGYDLAIHADAS-----IQFVIL-                                              |        |         | 1033 |
| NP_115454.2_MRFV      | 940  | TTELRDEWKALMDPRQDKWRFGTWESSLLKSARVLVIDEVYKMPRGYDLAIHADAA-----IQFVIL-                                                |        |         | 1003 |
| QCC30252.1_PeDV       | 982  | TVELRNEWKAAMKPKPANVWRISTWESSLLKSARVLVIDEVYKMPRGYDLAIHADPS-----VEFVIL-                                               |        |         | 1045 |
| SBuMV-BU1             | 1046 | TVELRSEWKDMLKLPKPAERWRIGTWESSLLKSARVLVIDEVYKMPRGYDLAIHSDS-----IQFVIV-                                               |        |         | 1109 |
| YP_003475889.1_OLV-3  | 1092 | TTELRSEWKDLLTLEPADRWRTWESSLLKSSRVLVIDEVYKMPRGYDLI----RTPPLIRPTQFVIIP                                                |        |         | 1157 |
| YP_009551972.1_AVF    | 1014 | STELRSEWKEAIKTKNSDNWRISTWESSLLKTARVLVIDEVYKMPRGYDLAIHADPT-----IEFVII-                                               |        |         | 1077 |
| ATJ00054.1_MsMV1      | 997  | STELRSEWKDAIKTKNSDNWRISTWESSLLKSARVLVIDEVYKMPRGYDLAIHADPT-----VEFVII-                                               |        |         | 1060 |
| QQG34652.1_DiMV1      | 1149 | TTELRTEWKEGMHLKSTTAWRVSTWESSLLKRSRVLVIDEVYKMPRGYDLDSILADPT-----LELVIL-                                              |        |         | 1212 |
| YP_002756536.1_GSyV-1 | 1018 | TVELRNEWKGVLVKVPQDNWRISTWESSLLKSARILVIDEVYKMPRGYDLAIHADPT-----IDLVIA-                                               |        |         | 1081 |
| QUS93818.1_GRVfV      | 1065 | TVELRNEWKDSLKSAPADRWRTWESSLLKSARIVVIDEVYKMPRGYDLAIHADST-----AQLFIV-                                                 |        |         | 1128 |
| Consensus_aa:         |      | ThELR <sup>s</sup> EWK. hhp. .ssp. WRltTWESSLLK <sup>h</sup> oARlLVIDE <sup>h</sup> YKMPRGYDLAIHtDso. . . . lphVih. |        |         |      |
| Consensus_ss:         |      | hhhhhhhhhhh eeeeehhh eeeee hhhhhhhhhh eeeee                                                                         |        |         |      |

|                       |      | HEL III                                                                                            | HEL IV |      |
|-----------------------|------|----------------------------------------------------------------------------------------------------|--------|------|
| Conservation:         |      | 88896997988666 969 77 69 59 57 9 99 985959 66 7 6 7 7 95 6                                         |        |      |
| YP_009505639.1_BlVS   | 1031 | LGDPLOQGVYHSTHPSSSTNSRLSPETHYLSKYIDFYCLWSHRIPQDVAKFFGVHSTNLAPGFSKWVPNLSP                           |        | 1100 |
| MZ422607.1_GaMV       | 1044 | LGDPLOQGEYHSTSPSSSNSRLSSEVRHLAPFIDYYCWSRRIPKLVADFFQLPTLSSEPGFTRLIRHLPS                             |        | 1113 |
| ADD13602.1_OBDV       | 1021 | LGDPLOQGEYHSTHPSSSNSRLIPEVSHLAPYLDYYCLWSYRVPQDVATFFQVQSHNPALGFARLSKQFPT                            |        | 1090 |
| AYC35261.1_CSDaV      | 1181 | LGDPLOQGEYHSTHPSSSTNSRLSEPQHLMSMYLDFYCLWSHRVPQNVAAFFHVKTTSKQPGFCRYQRELP                            |        | 1249 |
| QLM05437.1_GAMaV      | 1142 | LGDPLOQGEYHSTHASSTNARLLPEPRHLAPYLDYYCLWSHRIPRNVAFFQVPTSSTEEGFVRHVRELPG                             |        | 1211 |
| YP_009222597.1_NeVM   | 1037 | LGDPLOQGEYHSTHPSSNSRLVGTETRLHAPYLDYYCLWSRRVPKLIADFFHVPTSNENPGFARYSRQFPT                            |        | 1106 |
| MZ305310.1_PGMV       | 1009 | LGDPLOQGEYHSHAPQSTNARLHSEIIELSPYIDAYCWSRRIPKRIAKCLGVPTLSSKQGFVSFRRELPS                             |        | 1078 |
| QID59334.1_SbMV       | 978  | LGDPLOQGEYHSTHASSNHRLSSEVHRLRPYIDVYCAWTRRLPRRIARIFNIPTTSEHGFVITYSKGFPH                             |        | 1047 |
| QID59002.1_CaMaV      | 1127 | LGDPLOQGEYHSTHPSSSNRPLPSEISHLRRYIDFYCFWSHRIPRNVAQCLGVPTTSKLEGFATYTHQFPT                            |        | 1196 |
| QQG34656.1_DiMV2      | 1160 | LGDPLOQGEYHSHHPSSSTNARLSSEILHLPYIDFYCMWSHRIPQDLARFFQIKSSNTSPGFRHHHLNLS                             |        | 1229 |
| YP_004464920.1_SwMV   | 1034 | LGDPLOQGEYHSTHPSSSNARLSPEHRYLRPYIDFYCFWSRRIPQYVATILGVPTTSKVSFYARHSSQFPL                            |        | 1103 |
| NP_115454.2_MRFV      | 1004 | LGDPLOQGEYHSTHPSSSNARLSPEHRYLRPYVDFYCFWSRRIPQNVARVLDVPTTSTEMGFARYSQFPP                             |        | 1073 |
| QCC30252.1_PeDV       | 1046 | LGDPLOQGEYHSTHPSSSNARLSSELKHLRPYLDYCYLWSRRIPQQIARFFQVPTLSDAPGYVRYMRSEST                            |        | 1115 |
| SBuMV-BU1             | 1110 | LGDPLOQGEYHSTSPDSSNSRLSPETSHLSRYIDFYCLWSHRVPHLISGVFQVPTSSSNPGFVSHHRSLLP                            |        | 1179 |
| YP_003475889.1_OLV-3  | 1158 | WRSPSQGEYNSTHPSSNLRTITSEIIHLQPYIDFYCFWSYRIPKNVAACLKVPTTSNKTGFIRRLNSIPN                             |        | 1227 |
| YP_009551972.1_AVF    | 1078 | LGDPLOQGEYHSHSNPSSSNHKLSPETSHLRKYIDFYCFWSRRIPQSVAAFFQVPTLNSPTSKFSKFPVSPV                           |        | 1147 |
| ATJ00054.1_MsMV1      | 1061 | LGDPLOQGEYHSHSNPSSSNHRLSPETLHLKPYIDFYCFWSRRIPQSIAAFFQVPTLNSNPGFSKFVPSVPS                           |        | 1130 |
| QQG34652.1_DiMV1      | 1213 | LGDPLOQGEYHSTHPSSSNHKISSEIPLKPYIDYYCLWSRRVPQVAKFFNIPLNPNLGSFSYTPHLPE                               |        | 1282 |
| YP_002756536.1_GSyV-1 | 1082 | LGDPLOQGVYHSTHSDSSNHRLSSEVKHLQPYMDYYCLWSHRVPQDIGTFFGIKSTSTVPGFKSQYQANIPS                           |        | 1151 |
| QUS93818.1_GRVfV      | 1129 | LGDPLOQGEYHSTNPSSNSRLASEIKHLQPYMDMYCMWSHRIPRNVARFVRVKTSSVEGVSSTSLVLAP                              |        | 1198 |
| Consensus_aa:         |      | LGDPLOQGEYHsopP <sup>h</sup> SoN. RLssEh. +L. . YlDhYChWS+RlPp. lA. hh. l. o. sp. . G@. p@. . phss |        |      |
| Consensus_ss:         |      | e hhhhhh hhhhhh eeeee hhhhhhhh eeeee                                                               |        |      |

|                       |      | HEL V                                                                    |    |    |    |    |   |     |     |     |   | HEL VI |    |     |    |    |     |      |    |    |    |   |   |   |   |   |   |   |   |   |   |   |   |   |   |   |   |   |   |   |   |   |   |   |   |   |   |   |   |   |   |   |   |   |   |   |   |   |   |   |   |   |   |   |   |   |   |   |   |   |   |   |
|-----------------------|------|--------------------------------------------------------------------------|----|----|----|----|---|-----|-----|-----|---|--------|----|-----|----|----|-----|------|----|----|----|---|---|---|---|---|---|---|---|---|---|---|---|---|---|---|---|---|---|---|---|---|---|---|---|---|---|---|---|---|---|---|---|---|---|---|---|---|---|---|---|---|---|---|---|---|---|---|---|---|---|---|
|                       |      | 8                                                                        | 67 | 56 | 55 | 96 | 7 | 877 | 999 | 979 | 6 | 56     | 99 | 676 | 99 | 68 | 699 | 9995 | 66 | 86 | 99 |   |   |   |   |   |   |   |   |   |   |   |   |   |   |   |   |   |   |   |   |   |   |   |   |   |   |   |   |   |   |   |   |   |   |   |   |   |   |   |   |   |   |   |   |   |   |   |   |   |   |   |
| Conservation:         |      |                                                                          |    |    |    |    |   |     |     |     |   |        |    |     |    |    |     |      |    |    |    |   |   |   |   |   |   |   |   |   |   |   |   |   |   |   |   |   |   |   |   |   |   |   |   |   |   |   |   |   |   |   |   |   |   |   |   |   |   |   |   |   |   |   |   |   |   |   |   |   |   |   |
| YP_009505639.1_BlVS   | 1101 | SS                                                                       | K  | I  | L  | T  | N | S   | Q   | N   | S | M      | K  | T   | L  | V  | D   | C    | G  | F  | A  | S | V | T | I | A | S | S | Q | G | S | T | Y | P | G | A | T | N | I | L | D | R | N | S | A | L | L | S | H | S | N | S | L | V | A | L | T | R | S | K | K | G | V | V | F | T | G | D | R |   |   |   |
| MZ422607.1_GaMV       | 1114 | Q                                                                        | A  | K  | I  | L  | T | N   | S   | Q   | N | S      | S  | R   | V  | L  | N   | D    | C  | G  | R  | A | S | T | T | I | A | S | S | Q | G | S | T | Y | D | G | P | S | I | L | L | D | R | H | T | A | L | L | S | P | A | H | S | L | V | A | L | T | R | S | K | V | G | I | I | F | V | G | D | V |   |   |
| ADD13602.1_OBDV       | 1091 | T                                                                        | G  | R  | V  | L  | T | N   | S   | Q   | N | S      | M  | L   | T  | M  | T   | Q    | C  | G  | Y  | S | A | V | T | I | A | S | S | Q | G | S | T | Y | S | G | A | T | H | I | H | L | D | R | N | S | S | L | S | P | S | H | S | L | V | A | L | T | R | S | R | T | G | V | F | F | S | G | D | P |   |   |
| AYC35261.1_CSDaV      | 1250 | N                                                                        | S  | R  | I  | L  | N | S   | Q   | N   | A | G      | H  | T   | L  | Q  | Q   | C    | G  | Y  | A  | A | V | T | I | A | S | S | Q | G | S | T | Y | E | N | A | C | I | H | L | D | R | N | S | S | L | S | P | A | H | S | M | V | A | L | T | R | S | K | V | G | V | F | T | G | D | P |   |   |   |   |   |
| QLM05437.1_GAMaV      | 1212 | D                                                                        | S  | R  | I  | L  | T | N   | S   | Q   | N | A      | G  | H   | T  | P  | Q   | Q    | C  | G  | Y  | A | A | V | T | I | A | S | S | Q | G | S | T | Y | P | G | A | C | I | H | L | D | R | N | S | S | L | S | H | A | H | P | L | V | A | L | T | R | S | R | K | G | V | L | F | T | G | D | L |   |   |   |
| YP_009222597.1_NeVM   | 1107 | D                                                                        | A  | R  | V  | L  | T | N   | S   | Q   | N | A      | M  | H   | T  | M  | N   | Q    | C  | G  | Y  | Q | S | V | T | I | A | S | S | Q | G | S | T | Y | S | G | A | C | I | H | L | D | K | N | S | A | L | L | S | H | G | H | S | L | V | A | L | T | R | S | R | T | G | V | I | F | T | G | D | P |   |   |
| MZ305310.1_PGMV       | 1079 | K                                                                        | L  | R  | I  | L  | V | N   | S   | Q   | S | A      | M  | K   | T  | L  | N   | Q    | L  | G  | Y  | Q | A | I | T | I | A | S | S | Q | G | S | T | Y | R | S | P | A | C | I | H | L | D | R | N | S | R | L | L | S | H | Q | N | S | L | V | A | V | T | R | S | T | E | G | I | I | F | T | G | D | F |   |
| QID59334.1_SbMV       | 1048 | A                                                                        | R  | K  | V  | L  | A | N   | A   | R   | T | A      | T  | T   | L  | Q  | Q   | L    | G  | Y  | D  | S | V | T | I | A | S | S | Q | G | S | T | Y | D | R | P | T | V | V | H | L | D | K | N | S | R | L | L | S | H | Q | H | S | L | V | A | M | T | R | S | R | R | G | I | I | F | T | G | D | A |   |   |
| QID59002.1_CaMaV      | 1197 | N                                                                        | T  | K  | I  | L  | C | N   | S   | M   | S | A      | C  | K   | T  | L  | Q   | Q    | C  | G  | Y  | D | S | V | T | I | A | S | S | Q | G | S | T | Y | S | G | P | A | C | I | H | L | D | R | N | S | R | L | L | S | A | S | H | S | L | V | A | I | T | R | S | K | A | G | V | I | F | T | G | D | R |   |
| QQG34656.1_DiMV2      | 1230 | T                                                                        | C  | K  | I  | M  | A | N   | S   | Q   | N | A      | A  | R   | T  | L  | Q   | D    | C  | G  | Y  | S | S | V | T | I | A | S | S | Q | G | S | T | Y | S | S | A | C | I | H | L | D | R | N | S | A | V | L | S | H | S | H | S | L | V | A | L | T | R | S | K | S | G | I | I | F | T | G | D | K |   |   |
| YP_004464920.1_SwMV   | 1104 | N                                                                        | G  | K  | I  | L  | I | S   | A   | M   | T | S      | A  | K   | S  | L  | V   | D    | C  | G  | Y  | Q | A | I | T | I | A | S | S | Q | G | S | T | Y | V | N | G | P | V | H | I | H | L | D | N | H | A | R | R | L | S | H | Q | H | S | L | V | A | I | T | R | S | R | A | G | L | V | F | T | G | D | P |
| NP_115454.2_MRFV      | 1074 | F                                                                        | G  | K  | I  | L  | I | S   | A   | R   | D | S      | A  | K   | S  | L  | A   | D    | C  | G  | Y  | H | A | V | T | I | A | S | S | Q | G | S | T | I | A | G | P | A | V | H | L | D | N | H | S | R | R | L | S | H | Q | H | S | L | V | A | I | T | R | S | K | S | G | I | V | F | T | G | D | K |   |   |
| QCC30252.1_PeDV       | 1116 | S                                                                        | A  | K  | L  | L  | A | N   | S   | I   | P | T      | A  | K   | T  | L  | Q   | Q    | V  | G  | Y  | N | A | I | T | I | S | S | S | Q | G | S | T | L | D | G | P | A | F | I | H | L | D | R | H | S | T | L | S | H | H | S | L | V | A | L | T | R | S | R | A | G | V | V | F | T | G | D | K |   |   |   |
| SBuMV-BU1             | 1180 | N                                                                        | S  | K  | I  | L  | T | C   | S   | Q   | S | S      | A  | K   | T  | L  | L   | Q    | C  | G  | Y  | S | A | V | T | I | A | S | S | Q | G | S | T | Y | E | G | P | A | C | I | H | L | D | R | N | S | R | S | L | S | D | S | H | S | F | V | A | V | T | R | S | K | K | G | I | I | F | T | G | D | L |   |
| YP_003475889.1_OLV-3  | 1228 | A                                                                        | N  | K  | V  | L  | T | C   | S   | Q   | S | S      | M  | K   | T  | L  | N   | Q    | C  | G  | F  | S | S | V | T | I | A | S | S | Q | G | S | T | L | Q | E | A | C | I | H | L | D | R | N | S | R | N | L | S | N | S | H | S | L | V | A | L | T | R | S | K | S | G | I | I | F | T | G | D | F |   |   |
| YP_009551972.1_AVF    | 1148 | N                                                                        | T  | P  | L  | L  | V | N   | S   | Q   | S | A      | S  | Q   | I  | L  | S   | A    | G  | F  | R  | A | L | T | I | A | S | S | Q | G | A | T | F | S | A | P | T | A | I | H | L | D | K | N | T | K | S | L | S | P | Q | H | S | L | V | A | L | T | R | S | K | S | G | I | L | F | T | G | D | Q |   |   |
| ATJ00054.1_MsMV1      | 1131 | N                                                                        | T  | P  | L  | L  | V | N   | S   | Q   | S | A      | S  | Q   | V  | L  | Q   | A    | A  | G  | F  | R | A | L | T | I | A | S | S | Q | G | A | T | F | S | A | P | T | A | V | H | L | D | K | N | T | K | S | L | S | P | Q | H | S | L | V | A | L | T | R | S | K | V | G | I | L | F | T | G | D | Q |   |
| QQG34652.1_DiMV1      | 1283 | G                                                                        | Y  | P  | V  | L  | A | C   | S   | N   | N | Q      | V  | T   | L  | T  | Q   | C    | G  | F  | R  | S | V | S | V | A | S | S | Q | G | S | T | Y | T | K | G | V | V | L | H | L | D | R | N | S | K | L | L | S | L | A | H | S | L | V | A | L | T | R | S | K | D | L | I | I | F | S | G | D | K |   |   |
| YP_002756536.1_GSyV-1 | 1152 | N                                                                        | L  | R  | Q  | L  | A | N   | S   | Q   | S | A      | A  | K   | V  | L  | N   | Q    | C  | G  | F  | S | S | V | T | I | A | S | S | Q | G | S | T | Y | S | A | P | A | C | I | H | L | D | R | H | S | M | S | L | S | H | A | H | S | L | V | A | L | T | R | S | K | S | G | V | I | F | T | G | D | K |   |
| QUS93818.1_GRVfV      | 1199 | G                                                                        | W  | K  | Q  | L  | T | N   | S   | M   | N | A      | A  | R   | T  | L  | N   | D    | C  | G  | F  | A | A | T | I | A | S | S | Q | G | S | T | Y | N | H | P | A | C | I | N | L | D | K | N | S | S | Q | L | S | H | A | H | S | L | V | A | L | T | R | S | K | V | G | I | M | F | T | G | D | L |   |   |
| Consensus_aa:         |      | ...lLhsSpst.poLpptG@.tlTtIASSOGST@p.shhhlbLD+pS..LS..hSLVALTRS+.GllFTGD. |    |    |    |    |   |     |     |     |   |        |    |     |    |    |     |      |    |    |    |   |   |   |   |   |   |   |   |   |   |   |   |   |   |   |   |   |   |   |   |   |   |   |   |   |   |   |   |   |   |   |   |   |   |   |   |   |   |   |   |   |   |   |   |   |   |   |   |   |   |   |
| Consensus_ss:         |      | eeeeehhhhhhhhhh hhh eeeee hhhheeeee eeeee h                              |    |    |    |    |   |     |     |     |   |        |    |     |    |    |     |      |    |    |    |   |   |   |   |   |   |   |   |   |   |   |   |   |   |   |   |   |   |   |   |   |   |   |   |   |   |   |   |   |   |   |   |   |   |   |   |   |   |   |   |   |   |   |   |   |   |   |   |   |   |   |

|                     |      |   |   |    |   |    |   |    |   |   |    | CS |   |   |   |   |   |   |   |   |   | RdRp |   |   |   |   |   |   |   |   |   |   |   |   |   |   |   |   |   |   |   |   |   |   |   |   |   |   |   |   |   |       |       |       |    |   |   |   |       |   |   |   |   |   |   |   |   |   |   |   |
|---------------------|------|---|---|----|---|----|---|----|---|---|----|----|---|---|---|---|---|---|---|---|---|------|---|---|---|---|---|---|---|---|---|---|---|---|---|---|---|---|---|---|---|---|---|---|---|---|---|---|---|---|---|-------|-------|-------|----|---|---|---|-------|---|---|---|---|---|---|---|---|---|---|---|
|                     |      | 6 | 9 | 65 | 5 | 57 | 5 | 85 | 9 | 6 | 95 |    |   |   |   |   |   |   |   |   |   |      |   |   |   |   |   |   |   |   |   |   |   |   |   |   |   |   |   |   |   |   |   |   |   |   |   |   |   |   |   |       |       |       |    |   |   |   |       |   |   |   |   |   |   |   |   |   |   |   |
| Conservation:       |      |   |   |    |   |    |   |    |   |   |    |    |   |   |   |   |   |   |   |   |   |      |   |   |   |   |   |   |   |   |   |   |   |   |   |   |   |   |   |   |   |   |   |   |   |   |   |   |   |   |   |       |       |       |    |   |   |   |       |   |   |   |   |   |   |   |   |   |   |   |
| YP_009505639.1_BlVS | 1171 | K | M | L  | E | E  | G | P  | T | S | N  | L  | L | F | S | R | Y | F | T | G | K | V    | S | L | A | G | L | F | P | S | E | L | P | K | C | P | H | L | T | V | P | L | T | S | R | S | V | K | L | S | G | A     | ----- |       |    |   |   |   |       |   |   |   |   |   |   |   |   |   |   |   |
| MZ422607.1_GaMV     | 1184 | A | Q | L  | H | G  | G | P  | T | C | N  | R  | L | L | S | D | F | W | A | G | R | K    | V | S | I | P | G | L | F | A | D | V | L | P | P | S | I | F | L | S | A | P | L | T | S | R | Q | R | S | V | S | G     | A     | G     | A  | S | A | P | A     | W | T | P | C | S | L | R | N | G | P | E |
| ADD13602.1_OBDV     | 1161 | A | L | L  | N | G  | G | P  | N | S | N  | L  | M | F | S | A | F | F | Q | G | K | S    | R | H | I | R | D | W | F | P | T | L | F | P | T | A | T | L | L | S | P | L | R | Q | R | H | N | R | L | T | G | A     | L     | --    | A  | P | E | V | P     | S | H | L | L | P | D | L | P | S |   |   |
| AYC35261.1_CSDaV    | 1320 | A | Q | L  | S | N  | A | P  | S | S | N  | R  | M | F | S | E | F | F | S | G | R | T    | R | P | L | H | D | W | F | H | N | E | F | P | K | A | T | I | L | T | E | P | L | K | T | R | G | P | R | L | T | G     | A     | ----- |    |   |   |   |       |   |   |   |   |   |   |   |   |   |   |   |
| QLM05437.1_GAMaV    | 1282 | G | I | L  | T | G  | H | T  | T | S | N  | R  | M | F | A | E | F | Y | S | G | K | S    | R | P | L | H | D | W | F | H | A | E | F | P | T | A | T | I | I | H | E | P | I | T | K | R | H | N | N | L | K | G     | A     | ----- |    |   |   |   |       |   |   |   |   |   |   |   |   |   |   |   |
| YP_009222597.1_NeVM | 1177 | S | I | L  | L | K  | G | A  | S | T | S  | N  | T | M | F | S | L | L | M | S | G | K    | T | R | P | I | Q | D | W | F | H | R | E | F | T | C | P | V | L | K | E | P | L | K | Q | R | H | N | R | L | T | G     | A     | H     | -- | G | E | T | ----- |   |   |   |   |   |   |   |   |   |   |   |
| MZ305310.1_PGMV     | 1149 | A | L | L  | D | G  | T | P  | S | A | N  | I  | L | S | H | V | A | Q | E | K | E | V    | D | L | R | A | L | L | S | L | I | A | P | K | V | P | Y | L | V | A | P | I | K | S | R | K | L | T | L | R | G | G     | ----- |       |    |   |   |   |       |   |   |   |   |   |   |   |   |   |   |   |
| QID59334.1_SbMV     | 1118 | S | I | L  | D | G  | T | S  | Q | A | N  | F  | I | F | S | A | M | A | R | N | T | P    | I | D | L | K | G | V | F | G | D | L | L | P | N | C | V | S | L | S | A | P | M | K | S | R | K | V | I | L | S | G     | A     | ----- |    |   |   |   |       |   |   |   |   |   |   |   |   |   |   |   |
| QID59002.1_CaMaV    | 1267 | Q | L | L  | D | G  | T | P  | S | S | N  | A  | M | F | S | A | L | F | A | G | K | P    | Y | S | A | A | Q | L | S | E | L | F | P | P | C | P | R | I | S | E | P | I | T | S | R | R | T | L | L | K | G | A     | A     | S     | H  | A | S | L | P     | Q | P | S | R | P | A | S | H | R | I | P |
| QQG34656.1_DiMV2    | 1300 | M | L | L  | S | G  | T | S  | T | S | N  | Y  | L | S | K | Y | W | N | G | D | K | V    | H | L | S | S | L | F | P | S | E | L | P | K | C | P | H | I | T | E | P | I | T | S | R | K | L | K | L | Q | G | S     | ----- |       |    |   |   |   |       |   |   |   |   |   |   |   |   |   |   |   |
| YP_004464920.1_SwMV | 1174 | S | V | A  | D | G  | T | S  | S | N | L  | L  | F | S | A | V | L | M | N | H | P | I    | S | V | R | S | L | F | S | A | L | P | R | C | P | F | V | E | S | P | P | T | S | R | S | V | L | L | R | G | A | ----- |       |       |    |   |   |   |       |   |   |   |   |   |   |   |   |   |   |   |
| NP_115454.2_MRFV    | 1144 | A | A | A  | D | G  | T | S  | S | A | N  | L  | L | F | S | A | V | L | L | D | R | L    | S | V | R | S | L | F | S | A | L | L | P | C | C | P | F | V | T | E | P | P | T | S | R | A | V | L | L | R | G | A     | ----- |       |    |   |   |   |       |   |   |   |   |   |   |   |   |   |   |   |
| QCC30252.1_PeDV     | 1186 | S | Q | L  | S | G  | L | S  | A | S | N  | L  | M | F | S | A | L | A | S | N |   |      |   |   |   |   |   |   |   |   |   |   |   |   |   |   |   |   |   |   |   |   |   |   |   |   |   |   |   |   |   |       |       |       |    |   |   |   |       |   |   |   |   |   |   |   |   |   |   |   |



|                       |      |                                                                       |                          |                                                      |                  |      |     |   |    |
|-----------------------|------|-----------------------------------------------------------------------|--------------------------|------------------------------------------------------|------------------|------|-----|---|----|
| Conservation:         | 5    | 95                                                                    | 6                        | 6                                                    | 6677669998597999 | 8    | 795 | 6 | 78 |
| YP_009505639.1_BlVS   | 1236 | APMIKSSSVSDV                                                          | LD                       | PVRPFLGDGDLNAPQISTHFLPETRRPLHFDIPSGKPSS-DSPASAEPTVPV | HEP              | 1304 |     |   |    |
| MZ422607.1_GaMV       | 1271 | DPSVKSTEQRDV-ISHAPIVLGDGSLNAPQVSTHFLPETRRPLHFDLP                      | SAVCSS-VLSSPAAPTATAIEP   |                                                      |                  | 1338 |     |   |    |
| ADD13602.1_OBDV       | 1249 | AAAVKPFDRSDV-LSWAPIAVGDGETNAPRIDTSFLPETRRPLHFDLP                      | SFRPQAPPPSDPAPSGTAFEP    |                                                      |                  | 1317 |     |   |    |
| AYC35261.1_CSDaV      | 1386 | TPALKPDFQGDV-IIISAPIVLGSGELNAPQVSTHFLPETRRPLHWDIP                     | SAIPESATRPDSTEPTTCHPEP   |                                                      |                  | 1454 |     |   |    |
| QLM05437.1_GAMaV      | 1348 | QPALKPSSSTADV-VLSAEIAGVGDSYNQPVSTHFLPETRRPLHFDLP                      | SARAEPADLPQSTEPSTTAFEP   |                                                      |                  | 1416 |     |   |    |
| YP_009222597.1_NeVM   | 1248 | SPCIKPTEVSDI-ISADTVVLGDGALNRPQVSTHFLPEARRPLHSDLP                      | SAVPSSSELPSSADFTTPVHEP   |                                                      |                  | 1316 |     |   |    |
| MZ305310.1_PGMV       | 1206 | -EKISPDYRGDVIIDCAAFGLGLGDECMRPVSTHFLPETRRPLHIDIA                      | SALPSSADRPQAPDHSATAYEP   |                                                      |                  | 1274 |     |   |    |
| QID59334.1_SbMV       | 1177 | APPLKPDYQGDVILDLSAPFLGLGEANTPQVSTHFLPETRRPLHLDIP                      | SAKPENADRPTGPDHSDTAIEP   |                                                      |                  | 1246 |     |   |    |
| QID59002.1_CaMaV      | 1357 | SSAITPDFRGDDVIDHSHPVSGDGSANSQISTHFLPETRRPLHLDIA                       | SAIPSSADRPSTDPDTTAFEP    |                                                      |                  | 1426 |     |   |    |
| QQG34656.1_DiMV2      | 1365 | DPSVNSSFTADVINCINQSSIISGTGELNAPQISTHFLPETRRPLHFD                      | IPSAVPTA-CSLSDTDITTAYIEP |                                                      |                  | 1433 |     |   |    |
| YP_004464920.1_SwMV   | 1238 | SPPMRPDQGDVADIADLSAPFLGDGSSNAPQVSTHFLPESRRPLHFD                       | VPSARHQVADHPLKPDHSACAIEP |                                                      |                  | 1307 |     |   |    |
| NP_115454.2_MRfV      | 1208 | APPLGPDYVGDVILDSSAPILGDGSANAPQVSTHFLPETRRPLHFDIP                      | SARHQVADHPLAPDHSACAIEP   |                                                      |                  | 1277 |     |   |    |
| QCC30252.1_PeDV       | 1251 | DHGFSPTTRDDVFLTQEDIVSGDELALQRVDTTFLPETRRPLHQDLPS                      | AINEP-APPTSVKFSDSAYEP    |                                                      |                  | 1319 |     |   |    |
| SBuMV-BU1             | 1385 | ACVTDASSVADV-VAFAPLLHDFQPPVLPQVSTHFLPETRRPLHQDVPS                     | ALPEP-VSVSPVTHSDTAHEP    |                                                      |                  | 1452 |     |   |    |
| YP_003475889.1_OLV-3  | 1429 | ARTTNPEATGDI-ITQSEIVLGDGELNMPQVSTHFLPETRRPLHFDNP                      | SALPSS-TVPSVDLSRTAFEP    |                                                      |                  | 1496 |     |   |    |
| YP_009551972.1_AVF    | 1278 | SNPINSSFFIGDA-FSTASIFSGDGLNLPVSPHFLPETRLPLHFDLP                       | SAQISSAQPSDEVACSATPFTF   |                                                      |                  | 1346 |     |   |    |
| ATJ00054.1_MsMV1      | 1261 | KPPINSSFFVGDA-YSTATIFSGDGLIAPRVSPHFLPETRLPLHFDIP                      | SAQVSSANPSNETNPSATPFTF   |                                                      |                  | 1329 |     |   |    |
| QQG34652.1_DiMV1      | 1454 | YTSIDSNYTADIYLNQSNTYHTPTE-DTNQISTHFLPETRRPLHFDLP                      | STQSDPNPSSAFLPSSSAPEP    |                                                      |                  | 1522 |     |   |    |
| YP_002756536.1_GSyV-1 | 1282 | -RVFNPERDDV-FVEAAVCGDGSNAPQVSTHFLPETRRPLHFDLP                         | SAKPEFAAHAPAPLDTFTFIEP   |                                                      |                  | 1349 |     |   |    |
| QUS93818.1_GRVfV      | 1334 | ---LGPTDLPDLLLPEAPIIRNGESNAPQVSTHFLPETRRPLHFDV                        | ASAIPEPAKPSGVDPLDLASITP  |                                                      |                  | 1400 |     |   |    |
| Consensus_aa:         |      | s.shpss..sDl.ls.s..h.GsG..shPpISTHFLPETRRPLHbDlsSA..ps.s.s.s..oshhhpP |                          |                                                      |                  |      |     |   |    |
| Consensus_ss:         |      | ee                                                                    |                          |                                                      |                  |      |     |   |    |

|                       |       |                                                                          |               |   |      |      |       |   |    |          |    |   |    |           |
|-----------------------|-------|--------------------------------------------------------------------------|---------------|---|------|------|-------|---|----|----------|----|---|----|-----------|
| Conservation:         | 79989 | 97                                                                       | 66559         | 8 | 5875 | 698  | 95999 | 7 | 56 | 65576558 | 97 | 9 | 55 | 999995999 |
| YP_009505639.1_BlVS   | 1305  | VYPGETFENLAAHFLPCHDPEDREIHFRGQLSNQFP-HINRPFELACQSSSLLAAVH                | SERDDPTLLPASI |   |      | 1373 |       |   |    |          |    |   |    |           |
| MZ422607.1_GaMV       | 1339  | VYPGETFENLAAHFLPPHSPEDREITYRSQLSNQFP-HINRPFELAAQPSSLLAAIHNEKNDPTLLAASI   |               |   |      | 1407 |       |   |    |          |    |   |    |           |
| ADD13602.1_OBDV       | 1318  | VYPGETFENLVAHFLPAHDPTDREIHWRGQLSNQFP-HIDKEYHLAAQPMTLAPIHDSKHDPTLLAASI    |               |   |      | 1386 |       |   |    |          |    |   |    |           |
| AYC35261.1_CSDaV      | 1455  | VYPGETFENLAAHFLPAHDPTDREIYWQQLSNQFP-HMDKEFHLLAAQPMSSLLAAVHGEKQDPTLLPASI  |               |   |      | 1523 |       |   |    |          |    |   |    |           |
| QLM05437.1_GAMaV      | 1417  | VYPGETFENLAAHFLPAHDPTDREIHWAGQLSNQFP-HINKEYHLAAQPLSLLAAIHSEKDDPTLLPASI   |               |   |      | 1485 |       |   |    |          |    |   |    |           |
| YP_009222597.1_NeVM   | 1317  | VYPGETFENLAAHFLPAHDPTREIVFRNTMSNQFP-HLNKDFHLSAQPSSLLAAIHSEKDDPTLLPASI    |               |   |      | 1385 |       |   |    |          |    |   |    |           |
| MZ305310.1_PGMV       | 1275  | IYPGETFENVAHFLPAHDPAKKEINFRGMLSNQFP-HINMPFELSQAQPSNLLAAIHSSKHDPPTLLPASI  |               |   |      | 1343 |       |   |    |          |    |   |    |           |
| QID59334.1_SbMV       | 1247  | IYPGESFEALAAHFLPAHDPTREIYYRGEMSSQFP-HLNRPFELSQAQPSNLLAAIHAPKQDPTLLAASI   |               |   |      | 1315 |       |   |    |          |    |   |    |           |
| QID59002.1_CaMaV      | 1427  | VYPGETFENLAAHFLPAHDPEKDIYFKGQLSSQFP-HLNRDWSLSCQPSSLLAAIHSSKQDPTLLPASI    |               |   |      | 1495 |       |   |    |          |    |   |    |           |
| QQG34656.1_DiMV2      | 1434  | VYPGETFENLAGHFLPCHDPAQREIHYMGQLSNQFP-HIDRPFHLSAQPSLLAAIHDSKQDPTLLPASI    |               |   |      | 1502 |       |   |    |          |    |   |    |           |
| YP_004464920.1_SwMV   | 1308  | VYPGESFEQLAALFLPPTDAESKEIRFRGELSNQFP-HLDKPFELISAQPSLLAPVHNSKHDPPTLLPASI  |               |   |      | 1376 |       |   |    |          |    |   |    |           |
| NP_115454.2_MRfV      | 1278  | VYPGESFESLASLFLPPTDAESKETIFRGEEMSNQFP-HLDKPFELGAQTSSLLAPLHNSKHDPPTLLPASI |               |   |      | 1346 |       |   |    |          |    |   |    |           |
| QCC30252.1_PeDV       | 1320  | VYPGEDFFALAAHFLQANDPTREILFRDITLSCQFP-FLDEPFEISCQPMALLAAHREKKDPTLLPASI    |               |   |      | 1388 |       |   |    |          |    |   |    |           |
| SBuMV-BU1             | 1453  | VYPSENFENLVAHFLPRDPALEIYVQDQTSNQFP-LLDQPFHLSTLPSSLLAAIHSSKQDPTLLPASI     |               |   |      | 1521 |       |   |    |          |    |   |    |           |
| YP_003475889.1_OLV-3  | 1497  | VYPGETFENIAGHFMGPRDPEVLEIIHNDQMSNQFP-LLDQPFSLAAQPSLLMAAIHNSQNDPTLLPASI   |               |   |      | 1565 |       |   |    |          |    |   |    |           |
| YP_009551972.1_AVF    | 1347  | VYPGEDFFSLAAHFNPNHDPELKEILYRDACSNQFP-WVNLFPFEISCQPSLLAAIHSSKNDPTLLPASI   |               |   |      | 1415 |       |   |    |          |    |   |    |           |
| ATJ00054.1_MsMV1      | 1330  | IYPGEDFFSLAAHFNPNCHDPELKEILYRDACSNQFP-WVNQPFFEISCQPSLLAAIHSSKNDPTLLPASI  |               |   |      | 1398 |       |   |    |          |    |   |    |           |
| QQG34652.1_DiMV1      | 1523  | VYPGENFESVASSFIPPTDPETREIRFHGELSNQFP-YVNMPFKLSSLPSTLAAIHSSKHDPPTLLPASI   |               |   |      | 1591 |       |   |    |          |    |   |    |           |
| YP_002756536.1_GSyV-1 | 1350  | VYPGETFENIAAHFLPAHDPEKDIYFKDQRSNQFP-FIDQPFHVGAPASLCAAVHSSKQDPTLLAASI     |               |   |      | 1418 |       |   |    |          |    |   |    |           |
| QUS93818.1_GRVfV      | 1401  | VYPGESFENLARCFLPAHDPEKDIWYRNQLSNQFP-HMDKEFHLSAQPSLLAPVHSTARDPTLLKASI     |               |   |      | 1469 |       |   |    |          |    |   |    |           |
| Consensus_aa:         |       | VYPGEsFEsIaThfLp+DPp.+EIH@psphSsQFP.@lspSfclttQPtOLAAIHspKpDPTLLsASI     |               |   |      |      |       |   |    |          |    |   |    |           |
| Consensus_ss:         |       | hhhhhhhhh eeee hhhhhhhh                                                  |               |   |      |      |       |   |    |          |    |   |    |           |

|                       |          |                                                                          |    |     |    |      |   |      |   |   |      |        |                  |
|-----------------------|----------|--------------------------------------------------------------------------|----|-----|----|------|---|------|---|---|------|--------|------------------|
| Conservation:         | 99999965 | 69                                                                       | 76 | 697 | 99 | 97   | 5 | 8587 | 9 | 6 | 5977 | 875999 | 6997799789885697 |
| YP_009505639.1_BlVS   | 1374     | PKRLRFRPSSAPYRLTAKDEVLGSLLYEGLCRAYHRNSFTVLPFNETLYLECIALNEFAQLSSKTSQSVIM  |    |     |    | 1443 |   |      |   |   |      |        |                  |
| MZ422607.1_GaMV       | 1408     | QKRLRFRPSDAPYQLTSKDEILGSLLYEAWCEAYHRSPSDTVPFDPVLFACIALNEFAQLSSKTSQSVII   |    |     |    | 1477 |   |      |   |   |      |        |                  |
| ADD13602.1_OBDV       | 1387     | QKRLRFRPSAPYRITPRDELGLLFEGLCRAYHRSPSTHFPDEALFIECINLNEFAQLTSKQAVIM        |    |     |    | 1456 |   |      |   |   |      |        |                  |
| AYC35261.1_CSDaV      | 1524     | QKRLRFRPSDRPYQITPKDEILGQLLFEGLCRAYHRSPFHTEAFDPVLFACINLNEFAQLSSKTSQATIM   |    |     |    | 1593 |   |      |   |   |      |        |                  |
| QLM05437.1_GAMaV      | 1486     | QKRLRFRPTAPYFISPRDEILGQLLFEGLCRGYHRSPLSSEPFDPVLYAECICLNEFAQLTSKTSQAVIM   |    |     |    | 1555 |   |      |   |   |      |        |                  |
| YP_009222597.1_NeVM   | 1386     | GKRLRFRPSDAPYQITSKDEILGQLLYEGWCRAYSRNPNAEPPFDEALFACINLNEFAQLTSKTSQAVIM   |    |     |    | 1455 |   |      |   |   |      |        |                  |
| MZ305310.1_PGMV       | 1344     | SKRLRFRPSTRPYQITAKDELLGGLLFEGLCRAYHRSPELTHPFNEQLFIECIGLNEFAQLSSKTSQAVIM  |    |     |    | 1413 |   |      |   |   |      |        |                  |
| QID59334.1_SbMV       | 1316     | TKRLRFRPTSPYEITSKDELLGSLLFESLCRAYRRHPHSTVPFNETLFIECINLNEFAQLTSKTSQAVIM   |    |     |    | 1385 |   |      |   |   |      |        |                  |
| QID59002.1_CaMaV      | 1496     | AKRLRFRPSSKPYQITAKDQVLGQLLFEGLCRAYRRNPSTSTETFTFIECINLNEFAQLTSKTSQSVIM    |    |     |    | 1565 |   |      |   |   |      |        |                  |
| QQG34656.1_DiMV2      | 1503     | AKRLRFRPTSRPYTITARDELLGQLLFDLSCTAYHRSSSHLEDNEQLFIECIALNEFAQLSSKTSQNVIM   |    |     |    | 1572 |   |      |   |   |      |        |                  |
| YP_004464920.1_SwMV   | 1377     | AKRLRFRHNDASAYTISARDEILGGLLYEAWCRAYRRSPLDIEPFDPVLYAECINLNEFAQLSSKTSQATIM |    |     |    | 1446 |   |      |   |   |      |        |                  |
| NP_115454.2_MRfV      | 1347     | GKRLRFRHSEAPYVIAPRDEILGSLLYAACRAYHRSPRDVEPFDPDLYAECINLNEFAQLSSKTSQATIM   |    |     |    | 1416 |   |      |   |   |      |        |                  |
| QCC30252.1_PeDV       | 1389     | PKRLRFRPSEAPYSITPKDEILGGLLFNSLCRAYRRNPNDTVPFDEVLFAECIALNEFAQLTSKTSQATIM  |    |     |    | 1458 |   |      |   |   |      |        |                  |
| SBuMV-BU1             | 1522     | GKRLRFRPSNNPYHLTAKDEFLGGQLFEGLCRAYHRNPNDSHPFDPILFAECINLNEFAQLTSKTSQSTII  |    |     |    | 1591 |   |      |   |   |      |        |                  |
| YP_003475889.1_OLV-3  | 1566     | GKRLRFRPSNAPYPIAEDQILGSLLFELCRAYRRHPEAVVPFNPIAFACINLNEFAQLTSKTSQAVII     |    |     |    | 1635 |   |      |   |   |      |        |                  |
| YP_009551972.1_AVF    | 1416     | QKRLRFRPNSSPYQISTKDEVGLILFNSLCRAYHRNPSDVVPFDELLFIECINANEFSQLSSKTSQAVIM   |    |     |    | 1485 |   |      |   |   |      |        |                  |
| ATJ00054.1_MsMV1      | 1399     | QKRLRFRPNSSPYISTKDEVGLILYNALCRAYNRNPSTVVPFDELLFIECINANEFAQLSSKTSQAVIM    |    |     |    | 1468 |   |      |   |   |      |        |                  |
| QQG34652.1_DiMV1      | 1592     | PKRLRFRHNDSPYQISPKDELLGTFLYTSLLKAYRRPLYSTEPFDEALFIECINANEFSQLTSKTSQNVIM  |    |     |    | 1661 |   |      |   |   |      |        |                  |
| YP_002756536.1_GSyV-1 | 1419     | EKRLRFRASDAPYQITAKDEILGSLMFEAHCRAMRRDPNVRVPFDEALFACIALNEFAQLTSKTSQAVIM   |    |     |    | 1488 |   |      |   |   |      |        |                  |
| QUS93818.1_GRVfV      | 1470     | GKRLRFRPSDSPYRLTSKDEILGSLLFDAHTAMLRSPCASVPFDENLFAECIALNEFAQLSSKTSQAIIM   |    |     |    | 1539 |   |      |   |   |      |        |                  |
| Consensus_aa:         |          | .KRLRFRsOs.PYpLos+DELG.hL@pthC+AYpRsP.ss.PFs.hLfheCISlNEFAQLoSKTQtHh     |    |     |    |      |   |      |   |   |      |        |                  |
| Consensus_ss:         |          | hhh hhhhhhhhhh hhhhhhhhhhhh hhhhhhhh hhhhhhhh hhhhh                      |    |     |    |      |   |      |   |   |      |        |                  |

|                       |      | RdRp I                                                                                                                                                                            | RdRp II                              |
|-----------------------|------|-----------------------------------------------------------------------------------------------------------------------------------------------------------------------------------|--------------------------------------|
| Conservation:         |      | 695 9999999678979979599969659698                                                                                                                                                  | 99999999999987795899999998 69 769 56 |
| YP_009505639.1_BlVS   | 1444 | ANSKRSDPDWRYS <b>SAVRIFSKAQ</b> HKVNENSIFG <b>W</b> KACQ <b>TLALM</b> HDA <b>VLL</b> LG <b>PVKKYQ</b> RM <b>FDAQ</b> DRPA <b>L</b>                                                | 1513                                 |
| MZ422607.1_GaMV       | 1478 | ANASRSDPDWRWSVVRI <b>F</b> SK <b>TQ</b> HKVNENSIFG <b>S</b> W <b>K</b> ACQ <b>TLALM</b> HDA <b>VLL</b> LG <b>PVKKYQ</b> RI <b>FDAQ</b> DRP <b>STL</b>                             | 1547                                 |
| ADD13602.1_OBDV       | 1457 | GNARRSDPDWRWSAVRI <b>F</b> SK <b>TQ</b> HKVN <b>EGS</b> IFG <b>A</b> W <b>K</b> ACQ <b>TLALM</b> HDA <b>VLL</b> LG <b>PVKKYQ</b> RV <b>FDA</b> DRP <b>AHL</b>                     | 1526                                 |
| AYC35261.1_CSDaV      | 1594 | GNARRSDPDWRWSAVRI <b>F</b> SK <b>TQ</b> HKVN <b>EGS</b> IFG <b>S</b> W <b>K</b> ACQ <b>TLALM</b> HDA <b>VLL</b> LG <b>PVKKYQ</b> RV <b>FD</b> QDRD <b>RPHL</b>                    | 1663                                 |
| QLM05437.1_GAMaV      | 1556 | GNARRSDPDWRWSAVRI <b>F</b> SK <b>AQ</b> HKVN <b>EGS</b> IFG <b>P</b> W <b>K</b> ACQ <b>TLALM</b> HDA <b>VLL</b> LG <b>PVKKYQ</b> RV <b>FD</b> TRDRP <b>STL</b>                    | 1625                                 |
| YP_009222597.1_NeVM   | 1456 | GNARRSDPDWRWSAVRI <b>F</b> SK <b>AQ</b> HKVN <b>EGS</b> IFG <b>S</b> W <b>K</b> ACQ <b>TLALM</b> HDA <b>VLL</b> LG <b>PVKKYQ</b> RM <b>F</b> DQDRP <b>SHL</b>                     | 1525                                 |
| MZ305310.1_PGMV       | 1414 | ANACRSDPDWRWTAVRI <b>F</b> AK <b>AQ</b> HKVN <b>EGS</b> IFG <b>P</b> W <b>K</b> ACQ <b>TLALM</b> HDA <b>VLL</b> LG <b>PVKKYQ</b> RV <b>FD</b> EAER <b>PSHL</b>                    | 1483                                 |
| QID59334.1_SbMV       | 1386 | ANASRSDPDWRWTAVRI <b>F</b> SK <b>AQ</b> HKVN <b>EGS</b> IFG <b>S</b> W <b>K</b> ACQ <b>TLALM</b> HDA <b>VLL</b> LG <b>PVKKYQ</b> RI <b>F</b> DEIDR <b>PDHL</b>                    | 1455                                 |
| QID59002.1_CaMaV      | 1566 | ANASRSDPDWRWSAVRI <b>F</b> SK <b>SQ</b> HKVN <b>EGS</b> IFG <b>P</b> W <b>K</b> ACQ <b>TLALM</b> HDA <b>I</b> ILLG <b>PVKKYQ</b> RV <b>LD</b> QDRD <b>PAHL</b>                    | 1635                                 |
| QQG34656.1_DiMV2      | 1573 | SNASRSDPDWRWSAVRI <b>F</b> SK <b>TQ</b> HKVNENSIFG <b>D</b> W <b>K</b> ACQ <b>TLALM</b> HDA <b>I</b> ILLG <b>PVKKYQ</b> RI <b>FD</b> QDR <b>CPHL</b>                              | 1642                                 |
| YP_004464920.1_SwMV   | 1447 | ANANRSDPDWRWSAVRI <b>F</b> AK <b>TQ</b> HKVN <b>EGS</b> LF <b>G</b> S <b>W</b> KACQ <b>TLALM</b> HDA <b>VLL</b> LG <b>PVKKYQ</b> RV <b>FD</b> QDRD <b>PSHL</b>                    | 1516                                 |
| NP_115454.2_MRFV      | 1417 | ANANRSDPDWRWSAVRI <b>F</b> AK <b>TQ</b> HKVN <b>EGS</b> LF <b>G</b> S <b>W</b> KACQ <b>TLALM</b> HDA <b>VLL</b> LG <b>PVKKYQ</b> RV <b>FD</b> QDRD <b>PSHL</b>                    | 1486                                 |
| QCC30252.1_PedV       | 1459 | ANANRSDPDWRWTAVRI <b>F</b> AK <b>TQ</b> HKVN <b>DGS</b> IFG <b>S</b> W <b>K</b> ACQ <b>TLALM</b> HDA <b>VLL</b> LG <b>PVKKYQ</b> RV <b>FD</b> QADR <b>PSHI</b>                    | 1528                                 |
| SBuMV-BU1             | 1592 | ANARRSDPDWRWTAVRI <b>F</b> SK <b>TQ</b> HKVN <b>EGS</b> LF <b>D</b> W <b>K</b> ACQ <b>TLALM</b> HDA <b>VI</b> ILLG <b>PVKKYQ</b> R <b>H</b> FDAR <b>DPATI</b>                     | 1661                                 |
| YP_003475889.1_OLV-3  | 1636 | SNARRSDPDWRYSAVRI <b>F</b> SK <b>TQ</b> HKVN <b>DGS</b> FF <b>G</b> S <b>W</b> KACQ <b>TLALM</b> HDA <b>VI</b> ILLG <b>PVKKYQ</b> RL <b>FD</b> SEDR <b>PSHI</b>                   | 1705                                 |
| YP_009551972.1_AVF    | 1486 | ANSDRSDPDWRWSAVKI <b>F</b> SK <b>AQ</b> HKVN <b>EGS</b> LF <b>G</b> D <b>W</b> KACQ <b>TLALM</b> HDA <b>VI</b> ALG <b>PVKKYQ</b> RL <b>FD</b> KDQ <b>PSNI</b>                     | 1555                                 |
| ATJ00054.1_MsMV1      | 1469 | ANADRSDDPDWRWSAVRI <b>F</b> SK <b>AQ</b> HKVN <b>EGS</b> LF <b>G</b> D <b>W</b> KACQ <b>TLALM</b> HDA <b>VI</b> ALG <b>PVKKYQ</b> RI <b>FD</b> KTR <b>PDNI</b>                    | 1538                                 |
| QQG34652.1_DiMV1      | 1662 | ANAYRSDPDWRWSAVRI <b>F</b> AK <b>TQ</b> HK <b>TND</b> ASIFG <b>N</b> W <b>K</b> ACQ <b>TLALM</b> HDA <b>VI</b> ILLG <b>PVKKYQ</b> RI <b>FD</b> KRDR <b>PSNI</b>                   | 1731                                 |
| YP_002756536.1_GSyV-1 | 1489 | ANHERSDPDWRWTAVRI <b>F</b> AK <b>NQ</b> HKVN <b>SGS</b> LF <b>G</b> P <b>W</b> KACQ <b>TLALM</b> HDA <b>VI</b> LLF <b>G</b> P <b>V</b> KKY <b>Q</b> LI <b>H</b> DERDR <b>PEHI</b> | 1558                                 |
| QUS93818.1_GRVfV      | 1540 | ANRDRSDPDWRWSAVRI <b>F</b> AK <b>TQ</b> HKVN <b>DHS</b> IFG <b>G</b> W <b>K</b> ACQ <b>TLALM</b> HDA <b>VLL</b> LG <b>PVKKYQ</b> RI <b>FD</b> AADR <b>PSNI</b>                    | 1609                                 |
| Consensus_aa:         |      | tNtpRSDPDWR@oAVRI <b>F</b> t <b>K</b> o <b>HKVN</b> -t <b>S</b> LF <b>G</b> S <b>W</b> KACQ <b>TLALM</b> HDA <b>VI</b> LL <b>LG</b> P <b>V</b> KKY <b>Q</b> RI <b>FD</b> .pDRPsp1 |                                      |
| Consensus_ss:         |      | h hhhhhhhhh h eeeee hhhhhhhhhhhhhhhhhhhhh e                                                                                                                                       |                                      |

[illegible]

Conservation:

|                       |      |                                        | 6                     | 5          | 5       | 5         | 5             | 75       | 585        | Minor CP   |      |
|-----------------------|------|----------------------------------------|-----------------------|------------|---------|-----------|---------------|----------|------------|------------|------|
| YP_009505639.1_B1VS   | 1773 | SSAQRALLTSS                            | RQGRSLPDNPEVSKL       | QGELL      | QSFQ    | -----     | -----         | -----    | -----      | FV         | 1810 |
| MZ422607.1_GaMV       | 1807 | PAAIRYRLHSHKFLTRSLPESPDVTAL            | QEGELL                | HMSQ       | -----   | -----     | -----         | -----    | -----      | L          | 1843 |
| ADD13602.1_OBDV       | 1785 | PSRLRLAILHSSRQHRSLPEDPAVSSL            | QEGELL                | HTFHA      | -----   | -----     | -----         | -----    | -----      | PM         | 1823 |
| AYC35261.1_CSDaV      | 1923 | SSAARVAILRSSRNSRSMPPDDPTLL             | QEGELL                | QHfq       | -----   | -----     | -----         | -----    | -----      |            | 1958 |
| QLM05437.1_GAMaV      | 1885 | SSAARWAILHSSRSTRSQPEDPDVTRY            | QEGELL                | QHLQ       | -----   | -----     | -----         | -----    | -----      | SV         | 1922 |
| YP_009222597.1_NeVM   | 1784 | NSAARQILLHSSRNPRSLPEDPDTTKY            | QEGELL                | QTLQL      | -----   | -----     | -----         | -----    | -----      | SA         | 1822 |
| MZ305310.1_PGMV       | 1743 | NFKHRRQLHSSRQGRSLPDDPEVSKL             | QEGELL                | QTFQS      | -----   | -----     | -----         | -----    | -----      | NIKLPLSGGL | 1789 |
| QID59334.1_SbMV       | 1715 | SVNHRRQILHSGRLGRSMPEDPQVSQ             | QEGELL                | QSFQS      | -----   | -----     | -----         | -----    | -----      | SIHLPLRGGC | 1764 |
| QID59002.1_CaMaV      | 1895 | SAQDRRQILNSSRQSRMPEDPEVAQL             | QAE                   | LG         | YFHL    | SGGSDG    | SPNPAPHRT     | PCGPGQ   | QVIFPS     | SAGSPSGS   | 1963 |
| QQG34656.1_DiMV2      | 1902 | NSSQRKAILHAHRPSKTSYQNP                 | EVSKL                 | QSELL      | HSLQ    | -----     | -----         | -----    | -----      | LA         | 1939 |
| YP_004464920.1_SwMV   | 1776 | NSSHRRQLHSSRRRPRSLPEDPEVSKL            | QEGELL                | HQFQ       | -----   | -----     | -----         | -----    | -----      | SLHLPLRGA  | 1822 |
| NP_115454.2_MRFV      | 1746 | NSSHRRQLHSSRRRPRSLPEDPEVSKL            | QEGELL                | HQFQ       | -----   | -----     | -----         | -----    | -----      | SLHLPLRGG  | 1792 |
| QCC30252.1_PeDV       | 1788 | RGASKSKIIAA-RKTRPMPEASDVSQ             | HQ                    | QGL        | PKPYTFQ | -----     | -----         | -----    | -----      | GL         | 1824 |
| SBuMV-BU1             | 1921 | SSAARFAVVKF-RQSRSPEDPEVSKL             | QGH                   | LR         | DF      | FMSYFQ    | RNSHRARNSQ    | PPPPPPRP | IPPPPTPT   | PPP        | 1988 |
| YP_003475889.1_OLV-3  | 1965 | SATARHLLIKS-RLTRPPPESEVSKL             | QGQL                  | L          | AS      | FQHMFS    | RASK          | -----    | -----      | KS         | 2009 |
| YP_009551972.1_AVF    | 1815 | SSAQRI                                 | SFLKLSKLYRQ-NRLPIH    | SQHL       | EGELL   | PFMSNSSSS | LDFAPLADSNNFY | SNSDQVYH | PHSRSLP    | -----      | 1882 |
| ATJ00054.1_MsMV1      | 1798 | SSAQRI                                 | SFLKLTKNYRQ-NHLPVSTLH | EGELL      | PMSN    | -LSSTF    | DSPI          | SNIDNFFS | NTDQIYH    | PHSRSLP    | 1864 |
| QQG34652.1_DiMV1      | 1990 | SSP                                    | -----                 | -----      | EGELL   | PS        | -----         | FD       | SLTHSPDLLT | QQTI       | 2025 |
| YP_002756536.1_GSyV-1 | 1826 | NSAQRK                                 | VLLTRSPQLHFP          | PGDAPEVSKL | QEGELL  | QSF       | -----         | -----    | -----      | M          | 1862 |
| QUS93818.1_GRFV       | 1869 | SSLQRR                                 | ALRGKAVRQHFP          | GD         | SK      | EVTE      | LQEGELL       | HTFS     | -----      | MS         | 1906 |
| Consensus_aa:         |      | sts.R..llp.pp..+.scsP-lophQGL..hp..... |                       |            |         |           |               |          |            |            |      |
| Consensus ss:         |      | hhhhhhhhhhhh                           |                       |            |         |           |               |          |            |            |      |



| Conservation:         |      | CS                           |                                      | Major CP             |                |
|-----------------------|------|------------------------------|--------------------------------------|----------------------|----------------|
|                       |      | 6                            | 55 5                                 | 5                    |                |
| YP_009505639.1_BlVS   | 1811 | PQPSM-----NNSLLL-----        | PLFGG-----                           | LSPSLA               | AHPMGP         |
| MZ422607.1_GaMV       | 1844 | NQSSM-----HPDTLL-----        | PLHGG-----                           | SSNILPTPAIPSLPITPA-S | MANASL---      |
| ADD13602.1_OBDV       | 1824 | PSPPS-----L-----             | PLFGG-----                           | LSPDNILTPHEFRTALYE-- | SSAYPTPPNS     |
| AYC35261.1_CSDaV      | 1959 | -VPFM-----QSDTLL-----        | PLTGG--SAP--                         | ILTPEAFSTSLAFS       | MASD-----      |
| QLM05437.1_GAMaV      | 1923 | PSSRM-----NPD TLL-----       | PLKGG--SAP--                         | QLTPEAFSLALAQS       | MATPN-----     |
| YP_009222597.1_NeVM   | 1823 | PLHSM-----NHSTLL-----        | PLTGGSSASAP--                        | SLTPLQFSEAVTQS       | MASN-----      |
| MZ305310.1_PGMV       | 1790 | MENAL-----NCSTLTPD-----      | VPLPLSGA-LNSGY--                     | DPAPLYQSA            | MTTLA-----     |
| QID59334.1_SbMV       | 1765 | AEAHQ-----LLT-----           | PLSGA-----                           | ISTPPGQTF            | MALDA-----     |
| QID59002.1_CaMaV      | 1964 | PHHTL-----DCSTFSNCHMSDSLPELY | LSGGALNTPP--                         | ALSPSPSLLF           | MASTP-----     |
| QQG34656.1_DiMV2      | 1940 | DQPSM-----QPETLL-----        | PLTGS--NHPSQHFNIPQFSLP               | MSDAS-----           |                |
| YP_004464920.1_SwMV   | 1823 | PNPLA-----APFRLL-----        | PLGSAS--LGPSYSVAPLQPPPA              | SPASEPDS             | MAENA---       |
| NP_115454.2_MRFV      | 1793 | PNPLA-----ALFRL-----         | LQSSS--LGPTYAVAPIARAP                | VLPSP                | SMADNA---      |
| QCC30252.1_FeDV       | 1825 | TTHPL-----M-----             | TLSGAA-----                          | SPANLAFLGSSAVPDLEF   | M--S           |
| SBuMV-BU1             | 1989 | QPPSTSQSKPALHSSPSTFL-----    | PLLPEPVLLDP---                       | VPVESALAS            | PITPLDSSSVFDLP |
| YP_003475889.1_OLV-3  | 2010 | KSPSQSYQPRQPATPTSVL-----     | SPPSSPPLSPSTFAPPEPPPPPPPPPPPPPPSV    | QGIGIP               |                |
| YP_009551972.1_AVF    | 1883 | SNPLF-----                   | LSGGMALSAIEALAQLLPLIQGGRDLLASTSDVSSP |                      |                |
| ATJ00054.1_MsMV1      | 1865 | QPPIF-----                   | LSGGSMALTALEALTQLLPLIQGKNLLTSTQDVPEQ |                      |                |
| QQG34652.1_DiMV1      | 2026 | SHPPH-----L-----             | PMEE                                 | LALLPALRELLSKNSSDAH  | PSPQTVA--      |
| YP_002756536.1_GSyV-1 | 1863 | MQPT-----L-----              | PLTGG-----                           | LLLPPAVDAP           | MSDD-SLA-----  |
| QUS93818.1_GRVFV      | 1907 | SPPSK-----                   | LTGG-----                            | LLLPTSPS             | MSNEAT-----    |
| Consensus_aa:         |      | ..S.....L.....               | PL.tts...ss...hss...s.....s.....     |                      |                |
| Consensus ss:         |      | eee                          | hhh                                  | hh                   |                |

| Conservation:         |      | 55                                                              | 5          | 6            | 8               | 6          | 59               | 88        | 75      | CPI   | 6       |       |
|-----------------------|------|-----------------------------------------------------------------|------------|--------------|-----------------|------------|------------------|-----------|---------|-------|---------|-------|
|                       |      |                                                                 |            |              |                 |            |                  |           |         | 9996  |         |       |
| YP_009055639.1_BlVS   | 1843 | -----SQVGPAPP-NDD                                               | RVDR       | QPSLP----    | LAPRVAEVSPLHA-- | HIDY       | PFQW             | EVGT      | YS      | GD    | KA      | AFV   |
| M2422607.1_GaMV       | 1886 | -----TQVGPA                                                     | PA-ADSR    | IDAQPSLP---- | RAPRL           | LESSVPV--  | YIDY             | PFQW      | QI      | AS    | YTS     | GS    |
| ADD13602.1_OBDV       | 1863 | PTSM                                                            | SGIHASQVGP | PPA-SDDRT    | RQPSLP----      | LAPRL      | VESSLAVP--       | YVDV      | PFQW    | AV    | AS      | YAG   |
| AYC35261.1_CSDaV      | 1996 | -----AQAGPAPS                                                   | -RDDR      | VDRQ         | PRLP----        | AAPRVAE    | VGLNAP--         | SVDY      | PFQW    | VV    | AS      | YDG   |
| QLM05437.1_GAMaV      | 1962 | -----VQAGPPP                                                    | -SDDRT     | DRQ          | PPLP----        | RAPRL      | VEDASAIP--       | FVDY      | PFQW    | VV    | AS      | YDGL  |
| YP_009222597.1_NeVM   | 1863 | -----GQVGPPP                                                    | -RDDR      | VDRQ         | PRLP----        | VAPRVAE    | VDLQAP--         | TVDY      | PFQW    | VI    | SS      | YDG   |
| M2305310.1_PGMV       | 1831 | -----TNAGPAQ                                                    | -TDDR      | VDRQ         | PPLP----        | PAPRV      | ETAAP--          | HIDL      | PFQW    | LL    | GN      | APG   |
| QID59334.1_SbMV       | 1792 | -----TKVGAPD                                                    | -RDDR      | IDRQ         | PPLP----        | APPRV      | LETQAPV--        | HVDV      | PFQW    | VV    | SS      | YAGE  |
| QID59002.1_CaMaV      | 2013 | -----SDVGPPP                                                    | -SDDRR     | DHQ          | PRLP----        | APSRV      | VEALAPI--        | YIDY      | PFQW    | KV    | GT      | YTGA  |
| QQG34656.1_DiMV2      | 1977 | -----TQVGRPSD                                                   | -RDDR      | SDP          | QPSLP----       | LAPRL      | RETKAQ---        | EILY      | PFQW    | VV    | GE      | YDG   |
| YP_004464920.1_SwMV   | 1866 | -----TQVGPA                                                     | PA-RDDR    | LDRQ         | PAIP----        | APPRV      | LETAPH--         | YIDL      | PFQW    | KI    | TD      | FTGA  |
| NP_115454.2_MRFV      | 1834 | -----TNQVGVP                                                    | PP-RDDR    | VDRQ         | PPLP----        | DP         | RVLETAPSH--      | FLDL      | PFQW    | KV    | TD      | FTGA  |
| QCC30252.1_PeDV       | 1857 | NAQT----                                                        | PNVG       | PRPD-SDVR    | VDRQ            | PLLPAPN    | PGPPAPLPSKNP---- | DVTV      | PFQW    | VI    | SD      | FDG   |
| SBuMV-BU1             | 2043 | LHLM                                                            | ANVQTGQDSS | APP          | HRDR            | FD         | PQ               | PGLP----  | LAPSL   | SQTS  | SNQAP-- | FVDV  |
| YP_003475889.1_OLV-3  | 2066 | LHF                                                             | MANTTPPPSG | PAPP-RDDR    | VDRQ            | PPLP----   | LAPQI            | QETSSVP-- | HVDI    | PFQW  | LS      | ASLT  |
| YP_009551972.1_AVF    | 1925 | SSAQ----                                                        | AEKSPAG    | SSPDAR       | VL              | RAPPLP---- | SPARQ            | LS        | TPVSTSS | ISLD  | PFQW    | NFFDL |
| ATJ00054.1_MsMV1      | 1907 | TAAQ----                                                        | TPSSPAG    | SSPDAR       | VL              | RAPPLP---- | SPARQ            | L         | PTEVS   | ASSLS | IEL     | PFQW  |
| QQG34652.1_DiMV1      | 2064 | -----PAILPGSS                                                   | -SGM       | RLVSP        | PRLP----        | APVRS      | L                | TPPAS     | LAQDS   | ISL   | PFQW    | FTY   |
| YP_002756536.1_GsYV-1 | 1890 | -----GRARSQRD                                                   | -PDHR      | VDP          | QPSLP----       | LAPSV      | QETPGGP--        | AITV      | PFQW    | VA    | L       | VVK   |
| QUS93818.1_GRV        | 1930 | -----VPVSGRPS                                                   | RDDHRS     | SDP          | QVLP----        | LAPKV      | QESQAL----       | ALS       | IP      | PFQW  | VA      | L     |
| Consensus_aa:         |      | .....s.stssss.pDsRhD.p.LP.....ssp..ps.s.h...lshPFQW.h.shsG.s... |            |              |                 |            |                  |           |         |       |         |       |
| Consensus ss:         |      | .....euee.....euee.....euee                                     |            |              |                 |            |                  |           |         |       |         |       |

|                       |      | CP II                                                                                             |   |   |   |   |      |   |    |   |    |            |     |    |   |      | CP III   |   |   |   |   |        |   |   |   |   |     |   |   |   |   |   |   |   |   |   |   |   |   |   |   |   |   |   |   |   |   |   |   |   |   |   |   |   |   |   |   |   |   |   |   |   |      |      |      |      |      |      |      |      |      |
|-----------------------|------|---------------------------------------------------------------------------------------------------|---|---|---|---|------|---|----|---|----|------------|-----|----|---|------|----------|---|---|---|---|--------|---|---|---|---|-----|---|---|---|---|---|---|---|---|---|---|---|---|---|---|---|---|---|---|---|---|---|---|---|---|---|---|---|---|---|---|---|---|---|---|---|------|------|------|------|------|------|------|------|------|
| Conservation:         |      | 7                                                                                                 | 6 | 5 | 7 | 5 | 7858 | 7 | 58 | 8 | 75 | 955        | 796 | 65 | 7 | 6966 | 5        | 9 |   |   |   |        |   |   |   |   |     |   |   |   |   |   |   |   |   |   |   |   |   |   |   |   |   |   |   |   |   |   |   |   |   |   |   |   |   |   |   |   |   |   |   |   |      |      |      |      |      |      |      |      |      |
| YP_009050639.1_BlVS   | 1897 | SDDL                                                                                              | S | A | S | K | T    | L | K  | T | L  | T          | A   | G  | Y | R    | H        | A | E | I | L | S      | A | E | V | D | V   | F | L | P | L | A | S | F | S | K | P | I | S | V | G | A | V | W | T | I | A | S | I | S | P | A | S | A | H | E | Q | S | Y | Y | G | G | R    | L    | L    | T    | L    | G    | 1966 |      |      |
| MZ422607.1_ObMV       | 1939 | TDDL                                                                                              | S | A | S | P | T    | L | K  | K | V  | M          | A   | G  | Y | R    | H        | A | E | L | L | H      | V | E | L | F | S   | P | L | P | Q | S | F | S | K | P | V | S | L | S | A | V | T | I | S | S | L | C | P | A | T | T | E | G | T | E | T | S | F | Y | G | G | R    | V    | F    | T    | I    | G    | 2008 |      |      |
| ADD13602.1_ObDV       | 1926 | TDDL                                                                                              | S | G | S | H | L    | S | R  | L | T  | I          | G   | Y  | R | H    | A        | E | L | S | A | E      | L | F | A | P | L   | A | A | F | S | K | P | I | S | V | T | A | V | T | I | A | S | I | A | P | A | T | T | E | L | Q | Y | Y | G | G | R | L | L | T | L | G | 1995 |      |      |      |      |      |      |      |      |
| AYC35261.1_CSDaV      | 2050 | SDDL                                                                                              | S | G | S | A | T    | L | T  | K | V  | M          | A   | N  | Y | R    | H        | A | E | L | T | S      | V | E | L | V | C   | P | L | A | A | F | S | K | P | I | S | V | S | A | V | W | T | I | A | S | I | S | P | A | S | A | S | E | T | S | Y | Y | G | G | R | L | F    | T    | V    | G    | 2119 |      |      |      |      |
| QLM05437.1_GAMaV      | 2016 | TDVL                                                                                              | S | G | S | K | T    | L | S  | T | I  | T          | A   | N  | Y | R    | H        | A | E | L | L | S      | V | E | L | F | A   | P | L | A | G | S | F | S | K | P | I | T | L | S | A | V | W | T | V | G | S | I | P | A | T | T | T | E | T | S | Y | Y | G | G | R | V | I    | T    | I    | G    | 2085 |      |      |      |      |
| YP_009222597.1_NeVM   | 1917 | TEDL                                                                                              | A | G | S | A | T    | L | S  | K | L  | T          | A   | N  | Y | R    | H        | A | E | L | S | V      | E | L | V | A | P   | L | A | A | F | S | K | P | I | S | I | S | V | W | T | I | A | S | I | T | P | A | T | T | T | E | S | Y | Y | G | G | R | L | I | T | V | G    | 1986 |      |      |      |      |      |      |      |
| MD305310.1_PGMV       | 1883 | TDAM                                                                                              | A | T | S | V | N    | I | S  | K | L  | M          | A   | G  | Y | R    | H        | A | E | L | T | L      | T | K | L | E | V   | V | P | L | A | A | F | A | K | P | I | T | T | L | V | W | T | I | S | L | P | T | S | T | N | E | L | A | Y | G | G | R | Q | L | T | L | G    | 1952 |      |      |      |      |      |      |      |
| QID59334.1_SbMV       | 1845 | SHTL                                                                                              | A | A | A | G | R    | L | V  | N | L  | T          | S   | L  | Y | R    | H        | A | E | L | L | H      | A | E | V | F | A   | P | T | W | N | A | F | S | K | P | V | S | A | V | W | T | V | A | D | I | P | A | T | T | K | E | Q | E | Y | Y | G | G | R | Y | L | T | L    | G    | 1914 |      |      |      |      |      |      |
| QID59002.1_CaMaV      | 2066 | TDDL                                                                                              | S | G | S | A | T    | L | K  | T | I  | T          | N   | G  | Y | R    | H        | A | E | L | S | V      | E | A | E | F | S   | P | L | A | A | S | F | G | K | P | I | T | F | S | V | W | T | V | A | D | V | A | P | A | T | L | T | E | T | A | Y | Y | G | G | R | I | T    | I    | G    | 2135 |      |      |      |      |      |
| QOG34656.1_DiMV2      | 2029 | TEDL                                                                                              | S | A | S | S | S    | L | N  | K | V  | T          | A   | G  | Y | R    | H        | A | E | L | V | S      | L | E | L | E | F   | S | P | L | A | P | S | F | S | K | P | V | T | F | T | V | W | T | I | A | S | I | T | P | A | Q | T | K | E | T | T | Y | F | G | G | R | V    | L    | T    | I    | G    | 2098 |      |      |      |
| YP_004464920.1_SwMV   | 1919 | TGDL                                                                                              | S | A | S | P | V    | L | T  | T | L  | C          | A   | P  | Y | R    | H        | A | E | L | S | V      | E | L | S | L | A   | P | C | P | P | S | F | T | K | P | I | M | F | T | V | W | T | P | A | T | L | S | P | T | D | G | K | E | T | D | Y | F | G | G | R | Q | I    | S    | I    | G    | 1988 |      |      |      |      |
| NP_115454.2_MRFV      | 1887 | TDDL                                                                                              | S | A | S | A | V    | L | T  | T | C  | A          | P   | Y  | R | H    | A        | E | L | L | V | E      | I | S | V | A | P   | C | P | S | F | S | K | P | I | M | F | T | V | W | T | P | A | T | L | S | P | A | D | G | K | E | T | D | Y | Y | G | G | R | Q | I | T | V    | G    | 1956 |      |      |      |      |      |      |
| QCC30252.1_PeDV       | 1917 | TLDL                                                                                              | S | A | S | S | T    | L | K  | K | V  | T          | A   | Y  | F | R    | Y        | A | E | I | Q | S      | V | E | A | L | I   | I | A | D | A | A | I | S | K | P | I | P | V | S | L | V | W | T | I | N | T | L | P | D | S | G | K | E | L | D | Y | F | G | G | R | I | V    | A    | G    | 1986 |      |      |      |      |      |
| SBuMV-BU1             | 2107 | TTTL                                                                                              | A | S | A | S | P    | V | L  | T | T  | L          | C   | A  | P | Y    | R        | H | A | E | L | S      | V | E | L | F | V   | P | T | S | L | S | F | S | K | P | I | S | V | S | A | A | W | T | I | A | S | I | T | P | A | A | A | E | M | D | Y | Y | G | G | R | F | L    | T    | V    | G    | 2176 |      |      |      |      |
| YP_003475889.1_OLV-3  | 2129 | TVSL                                                                                              | S | A | S | Q | S    | T | L  | S | K  | L          | W   | A  | L | Y    | R        | H | A | E | L | S      | V | E | A | E | F   | V | P | T | A | S | S | F | K | P | I | S | I | S | C | A | W | T | I | A | S | I | T | P | A | S | D | G | K | E | T | D | Y | F | G | G | R    | F    | L    | T    | I    | G    | 2198 |      |      |
| YP_009551972.1_AVF    | 1986 | S                                                                                                 | I | S | I | A | G    | S | S  | H | I  | T          | L   | P  | Q | Y    | R        | Y | A | R | L | I      | N | L | E | V | V   | F | P | M | A | I | S | M | K | P | Q | T | V | D | V | W | C | T | A | D | Q | T | I | D | G | K | I | M | A | T | Y | G | S | Q | R | I | S    | I    | G    | 2055 |      |      |      |      |      |
| ATJ00054.1_MsMV1      | 1968 | S                                                                                                 | L | S | I | A | G    | S | T  | H | I  | T          | S   | L  | P | Q    | Y        | R | Y | A | R | L      | L | Q | E | L | V   | V | F | P | M | S | I | M | K | P | Q | T | V | D | V | W | S | T | A | D | Q | T | I | D | E | K | I | M | A | T | Y | G | S | Q | R | I | S    | I    | G    | 2037 |      |      |      |      |      |
| QOG34652.1_DiMV1      | 2120 | S                                                                                                 | L | D | V | S | G    | K | D  | V | I  | L          | N   | L  | I | K    | P        | F | S | H | A | R      | L | S | I | S | E   | A | V | V | F | P | Y | S | A | S | L | T | Y | P | Q | T | F | D | A | V | W | S | T | A | D | S | V | I | A | G | A | D | I | N | V | Y | G    | A    | Q    | R    | V    | T    | F    | G    | 2189 |
| YP_002756536.1_GsYV-1 | 1942 | T                                                                                                 | V | D | P | P | R    | A | K  | S | L  | T          | Q   | L  | I | G    | P        | Y | R | H | A | R      | L | S | L | E | A   | I | L | M | P | T | L | N | A | F | Q | N | P | V | T | V | H | M | V | W | T | V | N | T | V | Q | P | A | S | G | E | E | L | F | Y | P | G    | G    | Q    | A    | L    | T    | V    | G    | 2011 |
| QUS93818.1_GRVfV      | 1982 | T                                                                                                 | V | D | L | A | A    | S | T  | L | K  | K          | L   | T  | D | P    | F        | R | S | C | E | I      | T | H | L | E | V   | V | L | M | P | T | L | N | A | F | N | N | P | V | T | L | H | C | V | W | T | V | N | S | I | Q | P | A | S | G | D | E | L | L | Y | G | G    | Q    | A    | I    | T    | A    | G    | 2051 |      |
| Consensus_aa:         |      | o.sittstssllp <sup>h</sup> hs.yr@AcLhpl <sup>Eh</sup> .hhPh.sthppPlohshVwohssh..hsspbh.h@GGp.lolG |   |   |   |   |      |   |    |   |    |            |     |    |   |      |          |   |   |   |   |        |   |   |   |   |     |   |   |   |   |   |   |   |   |   |   |   |   |   |   |   |   |   |   |   |   |   |   |   |   |   |   |   |   |   |   |   |   |   |   |   |      |      |      |      |      |      |      |      |      |
| Consensus ss:         |      | eeeeee                                                                                            |   |   |   |   | hhhh |   |    |   |    | eeeeeeeeee |     |    |   |      | eeeeeeee |   |   |   |   | eeeeee |   |   |   |   | eee |   |   |   |   |   |   |   |   |   |   |   |   |   |   |   |   |   |   |   |   |   |   |   |   |   |   |   |   |   |   |   |   |   |   |   |      |      |      |      |      |      |      |      |      |

**CP II**

Conservation: CP III  
 YP\_009505639.1\_BlVS 1967 **GPV**LMSSST**TRIP**LDVSRINP**VIK**SSVSYSSTP**RI**SYTVYS-AA----GTANTAL**ISVIIRGIVRL**SG--- 2028  
 MZ422607.1\_GaMV 2009 **GPV**LMSSSTVLPADLNRLNPVILSPVAFTDCPRYSYTIYKCD-----SSNTSNLVSVLIRGVVRLSG--- 2070  
 ADD13602.1\_OBDV 1996 **GPV**LMGSGVTRIPADLTRLNPVIKTAVGFTDCPRFTYSVYANS-----GSANTPLITVMVRGVIRLSG--- 2057  
 AYC35261.1\_CSDaV 2120 **GPV**LMSSSTTHLPADLTRLNPVLKGPVKYTDPCRFYSYSVYNSG-----GKTGTNLCTIILRGVVRLSG--- 2181  
 QLM05437.1\_GAMaV 2086 **GPV**LMNSTTAVPADLRLNPVIKQISYTDPCRFYSVYANG-----GTAGTNLVTVLIRGVVRLRS--- 2147  
 YP\_009222597.1\_NeVM 1987 **GPV**LLSSTTRIPADLSRLNPILKSSVGKDTPRLSYTVYANS-----GTAGTNLCSVIIRGILRLSA--- 2048  
 MZ305310.1\_PGMV 1953 **GPV**LMGSTTTVPICDLTRINPHLKSSVTYNDTPRLTYTTYANS-----GAANAPLINFIVRGIIRLSG--- 2014  
 QID59334.1\_SbMV 1915 **GPV**AMGSGTTIVPADLARINPVIKSAVYIDGPRLSYTIYANG-----GTANTNLVNVITIRGSIRLSS--- 1976  
 QID59002.1\_CaMaV 2136 **GPV**LMSSSTSVPADLSRLNAVIKASVSYRDTPRLSYTACSCG-----GSANTNLAQVTLRGVVRLSG--- 2197  
 QQG34656.1\_DiMV2 2099 **GPV**LMSSSTSIADLSRLNPVIKSSVPFSDTPRFTFTSPGVSS-----ATKGSNLVSIILRGITIRLSG--- 2161  
 YP\_004464920.1\_SwMV 1989 **GPV**LMSSSTTAIPADLTRMNPVIKSSVAYRDTPRWTMSVPAVSG---GDTKVNLATGFIRGVIRVSA--- 2051  
 NP\_115454.2\_MRfV 1957 **GPV**MLSSTTAVPADLARMNPFIKSSVSYNTPRWTMSVPAVTG---GDTKIPLATAFVRGIVRVSA--- 2019  
 QCC30252.1\_PeDV 1987 **GPV**SLATRNVIPADLTRLTPIIKDRVSYSSTPRLTWTQAQKVAG---GAKGTTLCSLVIVGTILLSA--- 2049  
 SBuMV-BU1 2177 **GPV**LLSSTTHIPCLNSINPTIKTSVSYSDTPRFTFTARAVSG---GSANAALALVIIRGVVRLSG--- 2239  
 YP\_003475889.1\_OLV-3 2199 **GPV**LLSSTTHIPCDLRSINPTLRSSVEFRDTPRVTFARAVAG---ATANTPLAHFIIIRGVLRSLSG--- 2261  
 YP\_009551972.1\_AVF 2056 **GPL**NMSSSHSILPANLSSLNPVVKDSVTYNDTPKLCVRFYENSCKALGITAPICASLFIRGNIQLSS--- 2122  
 ATJ00054.1\_MsMV1 2038 **GPL**NMSSSHSILPANLSQLNPVVKDSVTYNDTPRINVRFFENADCKALGISAPVCASLFIRGKIRLSS--- 2104  
 QQG34652.1\_DiMV1 2190 **GPV**SSSVLITIPADLTKMNPILRDSVTYKDCPKLNLAIFYTNHDNLALGKTTPNCGAVIIRGVIQGS--- 2256  
 YP\_002756536.1\_GSyV-1 2012 **GPV**SMSALATVPADVSRLNPVIKGAFAFLDTPRLTGTTMKCA-----KSETSPMAYVIRGTLALSG--- 2073  
 QUS93818.1\_GRVFV 2052 **GPV**SMNALATVPADLSRLNPRIKSSVGYLTPRLTGTTMKCA-----TAQTLPLAYVMIRGMVSVSG--- 2113  
 Consensus\_aa: **GPV**.*h*tt*h*.*l*PADL*spl*N*ph*l*Kst*Vs@.*DhPRhohsh*..ss.....ts.sss*hh*.*lh***l****RG**.*lpl***St**...  
 Consensus\_ss: **eeee** **eee** **eeee** **eeeeeeeeeeee**

Conservation: 8 5  
 YP\_009505639.1\_BlVS 2029 ---PSGNTVA----- 2035  
 MZ422607.1\_GaMV 2071 ---PSGAKLT----- 2077  
 ADD13602.1\_OBDV 2058 ---PSGNTVTATT-- 2067  
 AYC35261.1\_CSDaV 2182 ---PSGNLLA----- 2188  
 QLM05437.1\_GAMaV 2148 ---PSGNLLA----- 2154  
 YP\_009222597.1\_NeVM 2049 ---PAGNILA----- 2055  
 MZ305310.1\_PGMV 2015 ---PSGNAF----- 2020  
 QID59334.1\_SbMV 1977 ---PSGGLLTSD--- 1985  
 QID59002.1\_CaMaV 2198 ---PTGNKLA----- 2204  
 QQG34656.1\_DiMV2 2162 ---PSGNHLA----- 2168  
 YP\_004464920.1\_SwMV 2052 ---PSGAAIKAAS-- 2061  
 NP\_115454.2\_MRfV 2020 ---PSGAATPSA--- 2028  
 QCC30252.1\_PeDV 2050 ---PTGTISI----- 2055  
 SBuMV-BU1 2240 ---PSGGKFT----- 2246  
 YP\_003475889.1\_OLV-3 2262 ---PSGAKFA----- 2268  
 YP\_009551972.1\_AVF 2123 ---PTATPSK----- 2129  
 ATJ00054.1\_MsMV1 2105 ---PSATPTK----- 2111  
 QQG34652.1\_DiMV1 2257 ---VRPTPTK----- 2263  
 YP\_002756536.1\_GSyV-1 2074 ---PVGTRLSE----- 2081  
 QUS93818.1\_GRVFV 2114 ---PMGIKL----- 2119  
 Consensus\_aa: ...**P**sts.*h*.....  
 Consensus\_ss: ...**P**sts.*h*.....

**h** - alpha-helix; **e** - beta-strand; **bold and uppercase letters** - conserved aa; **l** - aliphatic (I, V, L); **@** - aromatic (Y, H, W, F); **h** - hydrophobic (W, F, Y, M, L, I, V, A, C, T, H); **o** - alcohol (S, T); **p** - polar residues (D, E, H, K, N, Q, R, S, T); **t** - tiny (A, G, C, S); **s** - small (A, G, C, S, V, N, D, T, P); **b** - bulky residues (E, F, I, K, L, M, Q, R, W, Y); **+** - positively charged (K, R, H); **-** - negatively charged (D, E); charged (D, E, K, R, H); **bold** letters - conserved aa motifs; CS - protease cleavage site; highlighted in teal - protease catalytic diad aa, C and H; highlighted in yellow - start of PRO domain expressed in *E. coli*; highlighted in turquoise - tested cleavage site in *E. coli* [1]; MTase-Gtase - methyltransferase-guanylyltransferase; highlighted in bright green - marked conservative aa for MTase-Gtase domain; PRO - protease; TMD - transmembrane domain; Hel - helicase, RdRp - RNA dependent RNA polymerase; CP - coat protein; bold and light blue - putative M for major coat protein; highlighted in grey - sea buckthorn marafivirus (SBuMV) isolate BU1; sea buckthorn marafivirus (SBuMV) isolate BU1.

## References

1. Patel, A.; McBride, J.A.M.; Mark, B.L. The endopeptidase of the maize-affecting marafivirus type member maize rayado fino virus doubles as a deubiquitinase. *The Journal of biological chemistry* **2021**, 297, 100957.

**Table S1.** Primers used for SBuMV CPs and genome fragment amplification and sequencing.

| Primer name       | Primer sequence                                         | Application                                                    | Producer                 |
|-------------------|---------------------------------------------------------|----------------------------------------------------------------|--------------------------|
| M13seq-F          | 5' GCC AGG GTT TTC CCA GTC ACG A 3'                     | Forward Sequencing Primer                                      | metabion                 |
| M13seq-R          | 5' GAG CGG ATA ACA ATT TCA CAC AGG 3'                   | Reverse Sequencing Primer                                      | metabion                 |
| pJET1.2-F         | 5' CGA CTC ACT ATA GGG AGA GCG GC 3'                    | Forward Sequencing Primer                                      | Thermo Fisher Scientific |
| pJET1.2-R         | 5' AAG AAC ATC GAT TTT CCA TGG CAG 3'                   | Reverse Sequencing Primer                                      | Thermo Fisher Scientific |
| MetPro-seq2-R     | 5' AGG GTT CAG AAT CTG GGT TAG AAA TGG GAA C 3'         | Sequencing and 5' RACE                                         | metabion                 |
| MarRdRp-seq2-F    | 5' ACC TCT CAC GTG CAT GAG ACT AAC TGG CGA 3'           | Sequencing and 3' RACE                                         | metabion                 |
| MarCP-2F          | 5' GGT GGT CGT TTC CTC ACG GT 3'                        | 3' RACE                                                        | metabion                 |
| MarHel-seq3F      | 5' TTG TCA TTG TCC TCG GAG ACC CTC TTC AAG GA 3'        | Sequencing                                                     | metabion                 |
| MarRdRp-seq2-R    | 5' TCG CCA GTT AGT CTC ATG CAC GTG AGA GGT 3'           | Reverse Sequencing Primer                                      | metabion                 |
| MarRdRp-seq3R     | 5' GGA GGG TCG ATC GCG AGC ATC AAA GTG ACG T 3'         | Sequencing                                                     | metabion                 |
| Mar-RdRp-R        | 5' TAA AAG AAG TCA CGC AAA TGA CCC TGT AAT TTT GAC A 3' | HEL-RdRp fragment amplification and sequencing of PCR product  | metabion                 |
| Mar-Hel-F         | 5' GTT CTT GAC ATC GCC ACC CCC CGT 3'                   | HEL-RdRp fragment amplification and sequencing of PCR product  | metabion                 |
| Mar-Met1-F        | 5' GCA GCT CTA AAT CCA TCC TTT GCA TCA TTC ATC TCC A 3' | MET fragment amplification and sequencing of PCR product       | metabion                 |
| Mar-Met-R         | 5' CCA CCC CAC AAG GCG GGA 3'                           | MET fragment amplification and sequencing of PCR product       | metabion                 |
| Mar-Pro2-F        | 5' TCC CGC CTT GTG GGG TGG ATC CAT GCT 3'               | PRO fragment amplification and sequencing of PCR product       | metabion                 |
| Mar-Pro2-R        | 5' ACG GAA CGG GGG GTG GCG ATG TCA AGA 3'               | PRO fragment amplification and sequencing of PCR product       | metabion                 |
| MetPro-seq2-R     | 5' AGG GTT CAG AAT CTG GGT TAG AAA TGG GAA C 3'         | sequencing                                                     | metabion                 |
| MetPro-seq1-F     | 5' TCC GCT CTC ACT TGG CTG CAA ATC ACA ACC AT 3'        | sequencing                                                     | metabion                 |
| MetPro-seq1-R     | 5' ATG GTT GTG ATT TGC AGC CAA GTG AGA GCG GA 3'        | sequencing                                                     | metabion                 |
| Mar-CPL-F         | 5'TCT TAC TTC CAA CGA AAC TCC CGT 3'                    | Minor CP amplification                                         | metabion                 |
| MarCP1F           | 5' CCA ATG TCC AGA CCG GG CA 3'                         | Major CP amplification                                         | metabion                 |
| MarCP2R           | 5' TTA AGT GAA CTT TCC TCC AGA CGG T 3'                 | Minor and major CP amplification                               | metabion                 |
| MarBox1F          | 5' GAG AGC GAA TTC TTT CCC TGG A 3'                     | "Marafibox" amplification                                      | metabion                 |
| MarBox1R          | 5' TGT GAG GTT TCT GGG GAG AGT CT 3'                    | "Marafibox" amplification                                      | metabion                 |
| MARCP-short-Nde-F | 5' TAC ATA TGG CCA ATG TCC AGA CCG GGC AGG A 3'         | Major CP amplification for co-expression                       | metabion                 |
| MARCP-short-Xho-R | 5' GAC TCG AGT TAA GTG AAC TTT CCT CCA GAC GGT 3'       | Major CP amplification for co-expression                       | metabion                 |
| Mar-3UTR-RACE-R   | 5' GTA AGG TCT TGC TGG ACG ACC TTA TAC ACT 3'           | CP-3'UTR fragment amplification and sequencing of PCR product  | metabion                 |
| Mar-5UTR-RACE-F   | 5' GGT ATC TGT TTT TAC CCT CTT TCT AGC TTA ATC GCT 3'   | 5'UTR-PRO fragment amplification and sequencing of PCR product | metabion                 |
| SB-RdRp-CP-seq-F  | 5' TGG CGA GAT CCC GCT CTC TGT TCT CGA AGT CAT CTT 3'   | RdRp-C-terminal part and CP fragment amplification             | metabion                 |



**Table S2.** The dataset used for evolutionary relationship analysis. Accessions of the selected publicly available *Tymoviridae* entries and the related sequence metadata are listed. Origin column: “E” indicates that the isolate was listed as an exemplar isolate for the species in ICTV virus metadata resource; “ICTV” indicates that the species is recognized in the official taxonomy of *Tymoviridae*, but no accession was present in virus metadata resource; "RefSeq" indicates that the virus does not yet have standing in the official virus taxonomy but was included in the analysis based on taxonomy associated with a RefSeq entry; "Nucore>6k" indicates that the virus does not yet have a standing in the official virus taxonomy but was included in the analysis based on taxonomy associated with a complete or near-complete genome GenBank entry that was longer than 6000 bases in length.

(Please see separate excel file.)

**Table S3.** Descriptions of the generated MSA and features of the resulting trees.

(Please see separate excel file.)
